# Supplementary material for: Pesticide distribution and depletion kinetic determination in honey and beeswax: Model for pesticide occurrence and distribution in beehive products
Source: PubMed Central journal article supplement (PMC6382162; doi:10.1371/journal.pone.0212631), 2019-02-20
Supplement: pone.0212631.s001.pdf [file pone.0212631.s001.pdf]

1 **S1 Table. MRM transition and optimized parameters for pesticides analyzed by**  
2 **LC-MS/MS.**

3

4 **A. Positive ESI**

| <b>Compound</b>                                 | <b>DP<br/>(v)</b> | <b>EP<br/>(v)</b> | <b>CE<br/>(v)</b> | <b>CXP<br/>(v)</b> | <b>Q1<br/>(g/mol)</b> | <b>Q2<br/>(g/mol)</b> | <b>Retention<br/>Time<br/>(min)</b> |
|-------------------------------------------------|-------------------|-------------------|-------------------|--------------------|-----------------------|-----------------------|-------------------------------------|
| (Internal Standard) Bifenthrin D6               | 37.99             | 10                | 27.1              | 12                 | 312.8                 | 163.9                 | 10.51                               |
| (Internal Standard) Triphenylphosphat           | 37.7              | 10                | 27.1              | 12                 | 312.8                 | 163.7                 | 8.41                                |
| 4-Bromophenylurea (Metabolite<br>Metobromuron)  | 37.41             | 10                | 27.1              | 12                 | 312.8                 | 163.4                 | 4.81                                |
| Acephat                                         | 37.12             | 10                | 27.1              | 12                 | 312.9                 | 163.2                 | 1.01                                |
| Acequinocyl                                     | 36.83             | 10                | 27.1              | 12                 | 312.9                 | 163.0                 | 12.01                               |
| Acetamiprid                                     | 36.55             | 10                | 27.1              | 12                 | 313.0                 | 162.7                 | 4.01                                |
| Acetochlor                                      | 36.26             | 10                | 27.1              | 11.9               | 313.0                 | 162.5                 | 7.60                                |
| Acibenzolar-S-methyl                            | 35.97             | 10                | 27.1              | 11.9               | 313.0                 | 162.3                 | 7.130                               |
| Aclonifen                                       | 35.68             | 10                | 27.1              | 11.9               | 313.1                 | 162.1                 | 8.01                                |
| Acrinathrin                                     | 35.39             | 10                | 27.1              | 11.9               | 313.1                 | 161.8                 | 10.01                               |
| Alachlor                                        | 35.1              | 10                | 27.1              | 11.9               | 313.2                 | 161.6                 | 7.81                                |
| Aldicarb                                        | 34.82             | 10                | 27.1              | 11.9               | 313.2                 | 161.4                 | 4.51                                |
| Aldicarb-sulfoxid                               | 34.53             | 10                | 27.1              | 11.9               | 313.2                 | 161.1                 | 1.160                               |
| Aldoxycarb (Aldicarb-sulfuron)                  | 34.24             | 10                | 27.1              | 11.9               | 313.3                 | 160.9                 | 1.240                               |
| Allethrin                                       | 33.95             | 10                | 27.1              | 11.9               | 313.3                 | 160.7                 | 9.11                                |
| Ametoctradin                                    | 33.66             | 10                | 27.1              | 11.9               | 313.4                 | 160.5                 | 8.61                                |
| Ametryn                                         | 33.38             | 10                | 27.1              | 11.9               | 313.4                 | 160.2                 | 7.11                                |
| Amidosulfuron                                   | 33.09             | 10                | 27.1              | 11.9               | 313.5                 | 160.0                 | 2.51                                |
| Aminocarb                                       | 32.8              | 10                | 27.1              | 11.9               | 313.5                 | 159.8                 | 5.51                                |
| Aminopyralid                                    | 32.51             | 10                | 27.1              | 11.9               | 313.5                 | 159.6                 | 1.01                                |
| Amisulbrom                                      | 32.22             | 10                | 27.1              | 11.9               | 313.6                 | 159.3                 | 8.91                                |
| Amitraz                                         | 31.93             | 10                | 27.1              | 11.9               | 313.6                 | 159.1                 | 9.81                                |
| Amitraz Metabolite DMA (2,4-<br>Dimethylanilin) | 31.65             | 10                | 27.1              | 11.8               | 313.7                 | 158.9                 | 4.08                                |
| Amitraz Metabolite DMF                          | 31.36             | 10                | 27.1              | 11.8               | 313.7                 | 158.6                 | 5.01                                |
| Amitraz Metabolite DMPF                         | 31.07             | 10                | 27.1              | 11.8               | 313.7                 | 158.4                 | 0.00                                |
| Atrazin                                         | 30.49             | 10                | 27.1              | 11.8               | 313.8                 | 158.0                 | 6.20                                |
| Atrazin-desethyl                                | 29.63             | 10                | 27.1              | 11.8               | 313.9                 | 157.3                 | 4.0                                 |
| AvermectinB1a                                   | 29.34             | 10                | 27.1              | 11.8               | 314.0                 | 157.0                 | 10.01                               |
| AvermectinB1b                                   | 29.05             | 10                | 27.1              | 11.8               | 314.0                 | 156.8                 | 9.91                                |
| Azaconazol                                      | 28.76             | 10                | 27.1              | 11.8               | 314.1                 | 156.6                 | 6.61                                |
| Azadirachtin                                    | 28.47             | 10                | 27.1              | 11.8               | 314.1                 | 156.4                 | 5.10                                |
| Azamethiophos                                   | 28.19             | 10                | 27.1              | 11.8               | 314.1                 | 156.1                 | 5.50                                |
| Azinphos-ethyl                                  | 27.9              | 10                | 27.1              | 11.8               | 314.2                 | 155.9                 | 7.70                                |
| Azinphos-methyl 3                               | 27.61             | 10                | 27.1              | 11.8               | 314.2                 | 155.7                 | 7.00                                |
| Azinphos-methyl 4                               | 27.32             | 10                | 27.1              | 11.8               | 314.3                 | 155.4                 | 7.00                                |
| Azoxystrobin                                    | 27.03             | 10                | 27.1              | 11.7               | 314.3                 | 155.2                 | 7.10                                |
| BAC C 18                                        | 26.75             | 10                | 27.1              | 11.7               | 314.3                 | 155.0                 | 8.51                                |
| BAC C 20                                        | 26.46             | 10                | 27.1              | 11.7               | 314.4                 | 154.8                 | 9.150                               |
| BAC C 22                                        | 26.17             | 10                | 27.1              | 11.7               | 314.4                 | 154.5                 | 9.220                               |

|                           |       |     |      |      |       |       |       |
|---------------------------|-------|-----|------|------|-------|-------|-------|
| Benalaxyl                 | 25.88 | 10  | 27.1 | 11.7 | 314.5 | 154.3 | 8.31  |
| Bendiocarb                | 25.59 | 10  | 27.1 | 11.7 | 314.5 | 154.1 | 5.01  |
| Benfuracarb               | 25.3  | 10  | 27.1 | 11.7 | 314.5 | 153.8 | 9.01  |
| Benodanil                 | 25.02 | 10  | 27.1 | 11.7 | 314.6 | 153.6 | 6.31  |
| Benoxacor                 | 24.73 | 10  | 27.1 | 11.7 | 314.6 | 153.4 | 7.01  |
| Bensulfuron-methyl        | 24.44 | 10  | 27.1 | 11.7 | 314.7 | 153.2 | 6.71  |
| Benthiavalicarb Isopropyl | 24.15 | 10  | 27.1 | 11.7 | 314.7 | 152.9 | 7.51  |
| Benzylaminopurin          | 23.86 | 10  | 27.1 | 11.7 | 314.7 | 152.7 | 5.21  |
| Demeton-S-methyl-sulfon   | 41    | 10  | 23   | 12   | 263.2 | 168.9 | 2.10  |
| Desmedipham               | 21    | 10  | 19   | 14   | 318.3 | 182.2 | 6.80  |
| Diafenthiuron             | 86    | 10  | 27   | 10   | 385.3 | 329.0 | 9.00  |
| Dialifos                  | 41    | 10  | 23   | 12   | 395.8 | 187.0 | 8.60  |
| Diazinon                  | 19    | 10  | 29   | 8    | 305.2 | 169.0 | 8.40  |
| Dichlofenthion            | 26    | 10  | 21   | 14   | 314.9 | 258.9 | 9.20  |
| Dichlofluanid             | 24    | 8.5 | 21   | 12   | 350.0 | 223.9 | 7.70  |
| Dichlorbenzamid 2         | 76    | 10  | 77   | 14   | 191.9 | 74.0  | 2.50  |
| Dichlorvos                | 26    | 10  | 27   | 6    | 221.0 | 108.9 | 5.40  |
| Diclobutrazol             | 56    | 10  | 49   | 12   | 328.1 | 70.0  | 8.00  |
| Diclofop-Me               | 26    | 10  | 21   | 16   | 358.0 | 281.0 | 9.00  |
| Dicrotophos               | 41    | 10  | 19   | 8    | 238.1 | 112.1 | 3.00  |
| Diethofencarb             | 29    | 10  | 15   | 12   | 268.1 | 226.1 | 7.10  |
| Diethyltoluamid (DEET)    | 51    | 10  | 43   | 12   | 192.1 | 90.9  | 6.40  |
| Difenoconazol             | 81    | 10  | 35   | 18   | 406.0 | 250.9 | 8.50  |
| Difenoxuron               | 39    | 10  | 25   | 6    | 287.1 | 123.1 | 6.60  |
| Difenoxuron 2             | 39    | 10  | 25   | 6    | 287.1 | 72.1  | 6.50  |
| Diflufenican              | 81    | 10  | 33   | 16   | 395.0 | 266.0 | 8.70  |
| Dimefuron                 | 61    | 10  | 29   | 8    | 339.1 | 167.0 | 6.90  |
| Dimethachlor              | 66    | 10  | 19   | 14   | 256.1 | 223.9 | 7.00  |
| Dimethenamid              | 41    | 10  | 21   | 16   | 275.9 | 243.7 | 7.20  |
| Dimethoat                 | 31    | 10  | 15   | 14   | 230.1 | 198.9 | 3.60  |
| Dimethomorph              | 41    | 10  | 27   | 18   | 388.1 | 301.1 | 7.10  |
| Dimoxystrobin             | 56    | 10  | 15   | 14   | 327.1 | 205.0 | 8.00  |
| Diniconazol               | 54    | 10  | 47   | 12   | 326.6 | 70.1  | 8.40  |
| Dinotefuran               | 51    | 10  | 17   | 24   | 203.1 | 129.1 | 1.00  |
| Dioxacarb                 | 91    | 10  | 11   | 14   | 223.9 | 167.0 | 3.10  |
| Dioxathion                | 16    | 10  | 11   | 16   | 474.1 | 271.1 | 9.00  |
| Diphenamid                | 81    | 10  | 29   | 24   | 240.2 | 134.1 | 6.70  |
| Dipropetryn               | 61    | 10  | 39   | 12   | 256.2 | 144.1 | 8.10  |
| Disulfoton                | 9     | 10  | 17   | 4    | 275.1 | 89.1  | 8.50  |
| Disulfoton-Sulfon         | 51    | 10  | 41   | 16   | 307.1 | 96.9  | 6.40  |
| Disulfoton-Sulfoxid       | 31    | 10  | 19   | 12   | 291.1 | 184.7 | 6.30  |
| Ditalimfos                | 51    | 10  | 27   | 10   | 300.1 | 148.0 | 7.70  |
| Diuron                    | 41    | 10  | 39   | 6    | 233.2 | 72.2  | 6.50  |
| DMST                      | 41    | 10  | 19   | 8    | 215.2 | 106.0 | 5.60  |
| Dodemorph                 | 86    | 10  | 29   | 8    | 282.4 | 116.1 | 10.00 |
| Dodin 1                   | 101   | 10  | 37   | 4    | 228.3 | 60.1  | 8.40  |

|                           |     |    |     |    |       |       |       |
|---------------------------|-----|----|-----|----|-------|-------|-------|
| Dodin 2                   | 101 | 10 | 27  | 14 | 228.3 | 186.0 | 8.40  |
| DTAC                      | 76  | 10 | 43  | 10 | 229.3 | 60.1  | 8.00  |
| Edifenphos                | 81  | 10 | 19  | 12 | 311.0 | 283.0 | 8.10  |
| Emamectin B1a             | 26  | 10 | 121 | 12 | 886.2 | 82.1  | 9.30  |
| Emamectin B1b             | 56  | 10 | 117 | 10 | 872.2 | 82.0  | 9.10  |
| EPN                       | 51  | 10 | 19  | 18 | 324.1 | 296.0 | 8.40  |
| Epoxiconazol              | 51  | 10 | 95  | 14 | 330.2 | 75.0  | 7.80  |
| EPTC                      | 71  | 10 | 15  | 12 | 190.0 | 128.0 | 8.00  |
| Ethiofencarb              | 31  | 10 | 21  | 8  | 226.2 | 107.1 | 6.00  |
| Ethiofencarb 2            | 31  | 10 | 11  | 14 | 226.2 | 169.1 | 5.50  |
| Ethiofencarb sulfon       | 11  | 10 | 31  | 10 | 275.3 | 107.0 | 3.00  |
| Ethiofencarb-sulfoxide    | 21  | 10 | 29  | 10 | 242.3 | 107.1 | 3.00  |
| Ethion                    | 20  | 10 | 17  | 10 | 385.5 | 199.1 | 9.20  |
| Ethirimol                 | 46  | 10 | 31  | 8  | 210.2 | 140.0 | 6.30  |
| Ethofumesate              | 24  | 10 | 27  | 6  | 304.1 | 121.1 | 7.10  |
| Ethoprophos               | 26  | 10 | 29  | 6  | 243.3 | 131.1 | 7.70  |
| Ethoxyquin                | 81  | 10 | 43  | 8  | 218.2 | 160.2 | 7.70  |
| Etofenprox                | 26  | 10 | 19  | 12 | 394.2 | 177.2 | 10.40 |
| Etoxazol                  | 56  | 10 | 79  | 6  | 360.2 | 113.0 | 9.50  |
| Etrimfos                  | 56  | 10 | 25  | 22 | 293.0 | 264.9 | 8.20  |
| Famoxadon                 | 14  | 10 | 23  | 12 | 392.2 | 238.8 | 8.30  |
| Famphur                   | 66  | 10 | 33  | 6  | 326.0 | 125.0 | 6.50  |
| Fenamidon                 | 44  | 10 | 19  | 12 | 312.1 | 92.2  | 7.20  |
| Fenamiphos                | 46  | 10 | 31  | 12 | 304.2 | 217.0 | 7.90  |
| Fenamiphos-Sulfon         | 71  | 10 | 23  | 8  | 336.1 | 308.1 | 5.80  |
| Fenamiphos-Sulfoxid       | 81  | 10 | 23  | 8  | 320.1 | 292.0 | 5.60  |
| Fenarimol                 | 96  | 10 | 49  | 14 | 331.2 | 139.0 | 7.70  |
| Fenazaquin                | 36  | 10 | 31  | 8  | 307.2 | 161.2 | 9.80  |
| Fenbuconazol              | 41  | 10 | 37  | 6  | 337.1 | 125.1 | 7.80  |
| Fenbutatinoxid            | 111 | 10 | 35  | 12 | 519.3 | 463.2 | 12.00 |
| Fenchlorazol-ethyl        | 86  | 10 | 33  | 10 | 403.8 | 357.8 | 8.40  |
| Fenhexamid                | 121 | 10 | 31  | 10 | 301.9 | 97.1  | 7.60  |
| Fenitrothion              | 61  | 10 | 31  | 8  | 278.1 | 125.0 | 7.50  |
| Fenobucarb                | 41  | 10 | 13  | 8  | 208.1 | 152.0 | 7.00  |
| Fenoxycarb                | 36  | 10 | 31  | 8  | 302.4 | 87.9  | 7.90  |
| Fenpiclonil               | 10  | 10 | 35  | 10 | 253.9 | 202.1 | 6.80  |
| Fenpropathrin             | 41  | 10 | 19  | 10 | 350.2 | 125.1 | 9.60  |
| Fenpropidin               | 86  | 10 | 41  | 14 | 274.3 | 147.1 | 7.20  |
| Fenpropimorph             | 41  | 10 | 43  | 14 | 304.3 | 146.9 | 10.00 |
| Fenpyrazamin              | 61  | 10 | 45  | 36 | 332.2 | 189.1 | 7.60  |
| Fenpyroximat              | 21  | 10 | 23  | 20 | 422.2 | 366.3 | 9.70  |
| Fensulfothion             | 56  | 10 | 21  | 16 | 309.1 | 281.1 | 6.60  |
| Fensulfothion-oxon        | 61  | 10 | 25  | 22 | 293.0 | 236.8 | 4.70  |
| Fensulfothion-oxon-sulfon | 71  | 10 | 21  | 18 | 309.2 | 253.0 | 5.00  |
| Fensulfothion-sulfon      | 71  | 10 | 23  | 18 | 325.0 | 268.7 | 6.80  |
| Fenthion                  | 31  | 10 | 23  | 8  | 279.1 | 169.1 | 8.10  |

|                         |     |    |    |    |       |       |       |
|-------------------------|-----|----|----|----|-------|-------|-------|
| Fenthion-Oxon           | 71  | 10 | 23 | 16 | 262.7 | 230.9 | 6.80  |
| Fenthion-Oxon-Sulfon    | 91  | 10 | 29 | 20 | 295.2 | 217.0 | 4.00  |
| Fenthion-Oxon-Sulfoxid  | 71  | 10 | 39 | 18 | 279.2 | 104.0 | 3.80  |
| Fenthion-Sulfon         | 71  | 10 | 31 | 8  | 311.1 | 125.0 | 6.10  |
| Fenthion-Sulfoxid       | 81  | 10 | 45 | 20 | 295.1 | 109.1 | 5.90  |
| Fentin                  | 96  | 10 | 33 | 14 | 351.2 | 196.7 | 0.00  |
| Fenuron                 | 21  | 10 | 27 | 10 | 165.1 | 72.2  | 3.50  |
| Fenvalerat              | 36  | 10 | 21 | 16 | 437.0 | 167.0 | 9.90  |
| Fipronil                | 14  | 10 | 29 | 20 | 453.9 | 368.1 | 8.00  |
| Flamprop-Methyl         | 61  | 10 | 19 | 12 | 335.9 | 104.9 | 7.50  |
| Flazasulfuron           | 41  | 10 | 25 | 4  | 408.1 | 182.3 | 4.80  |
| Flonicamid              | 61  | 10 | 25 | 12 | 230.2 | 203.1 | 2.50  |
| Florasulam              | 51  | 10 | 31 | 12 | 359.9 | 128.9 | 3.50  |
| Fluazifop free acid     | 61  | 10 | 27 | 16 | 328.2 | 282.1 | 5.80  |
| Fluazifop-p-butyl       | 51  | 10 | 29 | 10 | 384.1 | 281.7 | 9.00  |
| Flucythrinat            | 36  | 10 | 45 | 10 | 469.2 | 181.0 | 9.50  |
| Fluensulfon             | 86  | 10 | 25 | 10 | 291.8 | 165.9 | 6.50  |
| Flufenacet              | 51  | 10 | 17 | 18 | 364.1 | 194.1 | 7.70  |
| Flufenoxuron            | 56  | 10 | 25 | 12 | 489.1 | 158.0 | 9.50  |
| Flufenzin               | 46  | 10 | 21 | 12 | 305.0 | 138.0 | 8.00  |
| Flumethrin              | 36  | 10 | 21 | 22 | 526.9 | 266.9 | 10.30 |
| Flumioxazin             | 101 | 10 | 29 | 8  | 355.1 | 327.2 | 7.00  |
| Fluopicolid             | 61  | 10 | 31 | 14 | 385.0 | 175.0 | 7.50  |
| Fluopyram               | 81  | 10 | 43 | 16 | 397.1 | 173.0 | 7.70  |
| Fluoxastrobin           | 96  | 10 | 25 | 12 | 459.1 | 427.2 | 7.70  |
| Fluoxypyr-meptyl        | 116 | 10 | 15 | 20 | 369.0 | 256.9 | 9.40  |
| Flupyradifuron          | 106 | 10 | 29 | 10 | 291.1 | 128.0 | 3.90  |
| Fluquinconazol          | 54  | 10 | 25 | 20 | 376.0 | 349.0 | 7.60  |
| Flurochloridon          | 91  | 10 | 31 | 6  | 314.0 | 294.0 | 7.60  |
| Flusilazol              | 36  | 10 | 25 | 14 | 316.1 | 247.1 | 7.90  |
| Fluthiacet-Me           | 191 | 10 | 31 | 10 | 405.9 | 346.1 | 7.50  |
| Flutolanil              | 71  | 10 | 27 | 26 | 324.2 | 262.1 | 7.40  |
| Flutriafol              | 44  | 10 | 39 | 6  | 302.1 | 122.9 | 6.40  |
| Fluxapyroxad            | 66  | 10 | 21 | 8  | 382.2 | 362.1 | 7.40  |
| Fomesafen               | 46  | 10 | 21 | 4  | 456.1 | 344.0 | 6.70  |
| Forchlorfenuron         | 56  | 10 | 25 | 8  | 248.0 | 128.9 | 6.40  |
| Formetanat              | 46  | 10 | 23 | 10 | 222.2 | 165.1 | 0.00  |
| Formothion              | 41  | 10 | 11 | 12 | 258.1 | 198.8 | 5.10  |
| Fosthiazat              | 61  | 10 | 27 | 4  | 284.0 | 104.1 | 6.10  |
| Fuberidazol             | 26  | 10 | 29 | 32 | 185.1 | 157.1 | 5.30  |
| Furametapyr             | 66  | 10 | 45 | 28 | 334.2 | 157.0 | 6.30  |
| Furathiocarb            | 46  | 10 | 25 | 20 | 383.2 | 194.9 | 9.00  |
| Halfenprox              | 44  | 10 | 27 | 10 | 494.1 | 183.1 | 10.80 |
| Halosulfuron-methyl     | 66  | 10 | 31 | 10 | 435.0 | 182.0 | 5.00  |
| Haloxypop-2-ethoxyethyl | 41  | 10 | 29 | 12 | 434.2 | 316.1 | 8.90  |
| Haloxypop-methyl        | 56  | 10 | 25 | 10 | 376.6 | 316.1 | 8.70  |

|                              |     |    |    |    |       |       |       |
|------------------------------|-----|----|----|----|-------|-------|-------|
| Heptenophos                  | 31  | 10 | 19 | 6  | 251.1 | 127.0 | 6.60  |
| Hexaconazol                  | 31  | 10 | 39 | 4  | 314.1 | 70.1  | 8.20  |
| Hexazianon                   | 61  | 10 | 25 | 16 | 253.1 | 171.1 | 5.50  |
| Hexythiazox                  | 41  | 10 | 21 | 12 | 353.2 | 228.1 | 9.20  |
| Icaridin (Picaridin)         | 86  | 10 | 21 | 24 | 230.2 | 130.1 | 6.70  |
| Imazalil                     | 41  | 10 | 31 | 4  | 297.2 | 159.0 | 8.10  |
| Imazamox                     | 106 | 10 | 29 | 24 | 306.0 | 261.0 | 2.10  |
| Imazaquin                    | 51  | 10 | 37 | 10 | 312.2 | 199.1 | 3.00  |
| Imazethaphyr                 | 51  | 10 | 37 | 10 | 290.1 | 177.2 | 2.50  |
| Imazosulfuron                | 71  | 10 | 19 | 10 | 412.9 | 153.0 | 4.70  |
| Imidacloprid                 | 36  | 10 | 23 | 16 | 256.1 | 209.5 | 3.00  |
| Indoxacarb                   | 51  | 10 | 21 | 10 | 528.1 | 293.1 | 8.70  |
| Iodosulfuronmethyl           | 41  | 10 | 29 | 12 | 508.1 | 167.1 | 4.80  |
| Iprobenfos                   | 66  | 10 | 31 | 6  | 288.9 | 91.0  | 8.00  |
| Iprodion                     | 31  | 10 | 21 | 10 | 330.1 | 245.0 | 7.80  |
| Iprovalicarb                 | 21  | 10 | 31 | 14 | 321.3 | 119.1 | 7.70  |
| Isazophos                    | 66  | 10 | 37 | 8  | 314.0 | 120.0 | 7.60  |
| Isofenphos                   | 51  | 10 | 17 | 18 | 346.2 | 244.9 | 8.50  |
| Isofenphos-Methyl            | 26  | 10 | 9  | 16 | 332.2 | 273.3 | 8.10  |
| Isofenphos-Oxon              | 36  | 10 | 17 | 6  | 329.8 | 229.0 | 7.60  |
| Isomethiozin                 | 26  | 10 | 17 | 12 | 269.2 | 200.1 | 8.20  |
| Isoprocarb                   | 41  | 10 | 21 | 6  | 194.1 | 95.1  | 6.30  |
| Isoprothiolane               | 41  | 10 | 17 | 42 | 291.0 | 231.1 | 7.40  |
| Isoproturon                  | 41  | 10 | 31 | 14 | 207.3 | 71.9  | 6.40  |
| Isopyrazam                   | 66  | 10 | 23 | 8  | 360.3 | 340.2 | 8.50  |
| Isoxaben                     | 66  | 10 | 17 | 12 | 333.1 | 85.0  | 7.30  |
| Isoxaflutole                 | 21  | 10 | 27 | 14 | 377.1 | 251.0 | 6.10  |
| Isoxathion 2                 | 44  | 10 | 21 | 6  | 314.0 | 105.0 | 8.50  |
| Ivermectin B1a               | 71  | 10 | 37 | 18 | 892.6 | 307.0 | 10.80 |
| Ivermectin B1b               | 66  | 10 | 35 | 16 | 878.5 | 293.2 | 10.50 |
| Kresoxim-Methyl              | 14  | 10 | 11 | 14 | 314.1 | 205.9 | 8.00  |
| Landrin (3,4,5-Trimethacarb) | 31  | 10 | 17 | 10 | 194.4 | 137.1 | 6.50  |
| Lenacil                      | 26  | 10 | 23 | 8  | 235.2 | 153.1 | 6.30  |
| Linuron                      | 36  | 10 | 25 | 16 | 249.2 | 159.7 | 7.00  |
| Malaoxon                     | 31  | 10 | 17 | 6  | 315.5 | 127.1 | 5.70  |
| Malathion                    | 24  | 10 | 17 | 6  | 331.1 | 127.0 | 7.50  |
| Mandestrobin                 | 71  | 10 | 15 | 12 | 314.2 | 192.1 | 8.10  |
| Mandipropamid                | 76  | 10 | 21 | 10 | 412.2 | 328.1 | 7.30  |
| Mecabarm 1                   | 19  | 10 | 15 | 12 | 330.0 | 227.0 | 7.80  |
| Mecabarm 2                   | 61  | 10 | 55 | 18 | 330.0 | 97.0  | 7.70  |
| Mefenpyr-diethyl             | 71  | 10 | 47 | 10 | 375.1 | 161.9 | 8.30  |
| Mepanipyrim                  | 51  | 10 | 37 | 10 | 224.2 | 106.0 | 7.60  |
| Mepronil                     | 21  | 10 | 39 | 12 | 270.2 | 119.1 | 7.40  |
| Mesosulfuron-methyl          | 61  | 10 | 33 | 12 | 504.1 | 181.9 | 5.50  |
| Metalaxyl                    | 41  | 10 | 19 | 12 | 280.3 | 220.0 | 6.50  |
| Metamitron                   | 36  | 10 | 25 | 12 | 203.2 | 174.9 | 3.50  |

|                       |     |    |    |    |       |       |      |
|-----------------------|-----|----|----|----|-------|-------|------|
| Metazachlor           | 10  | 10 | 15 | 10 | 278.1 | 210.1 | 6.50 |
| Metconazol            | 96  | 10 | 59 | 10 | 320.1 | 69.9  | 8.30 |
| Methabenzthiazuron    | 11  | 10 | 43 | 8  | 222.1 | 150.0 | 6.20 |
| Methacrifos           | 26  | 10 | 11 | 12 | 241.1 | 209.0 | 6.90 |
| Methamidophos         | 66  | 10 | 19 | 14 | 142.1 | 94.0  | 1.00 |
| Methidathion          | 21  | 10 | 15 | 6  | 302.9 | 145.1 | 6.90 |
| Methiocarb            | 31  | 10 | 15 | 12 | 226.3 | 169.9 | 7.10 |
| Methiocarbsulfon      | 29  | 10 | 29 | 6  | 275.1 | 122.0 | 4.20 |
| Methiocarbsulfoxid    | 36  | 10 | 19 | 36 | 242.2 | 185.1 | 3.50 |
| Methomyl              | 21  | 10 | 13 | 8  | 163.2 | 88.0  | 2.30 |
| Methothrin            | 51  | 10 | 25 | 10 | 321.2 | 135.1 | 8.00 |
| Methoxyfenozid        | 39  | 10 | 23 | 8  | 369.2 | 149.1 | 7.60 |
| Metobromuron          | 61  | 10 | 29 | 16 | 261.0 | 172.0 | 6.20 |
| Metolachlor           | 26  | 10 | 19 | 10 | 284.2 | 252.2 | 7.90 |
| Metolcarb             | 86  | 10 | 17 | 8  | 166.0 | 109.1 | 5.00 |
| Metosulam             | 86  | 10 | 35 | 20 | 419.0 | 174.9 | 5.50 |
| Metoxuron             | 61  | 10 | 39 | 12 | 229.2 | 72.0  | 4.80 |
| Metrafenon            | 61  | 10 | 21 | 12 | 409.1 | 209.0 | 8.50 |
| Metribuzin            | 29  | 10 | 25 | 10 | 215.1 | 187.2 | 5.40 |
| Metsulfuron-methyl    | 36  | 10 | 31 | 14 | 382.1 | 198.8 | 3.10 |
| Mevinphos             | 29  | 10 | 13 | 10 | 225.0 | 193.1 | 4.60 |
| MGK 264               | 101 | 10 | 19 | 14 | 276.1 | 210.1 | 8.70 |
| Milbemectin A3        | 86  | 10 | 11 | 20 | 546.1 | 511.2 | 9.80 |
| Milbemectin A4        | 96  | 10 | 11 | 20 | 560.0 | 525.2 | 9.60 |
| Molinat               | 21  | 10 | 19 | 6  | 188.1 | 126.1 | 7.40 |
| Monalide              | 76  | 10 | 29 | 16 | 239.9 | 85.1  | 7.90 |
| Monocrotophos         | 31  | 10 | 23 | 10 | 224.2 | 126.9 | 2.40 |
| Monolinuron           | 61  | 10 | 37 | 14 | 215.2 | 126.0 | 6.00 |
| Monuron               | 56  | 10 | 23 | 2  | 199.1 | 72.0  | 5.20 |
| Myclobutanil          | 46  | 10 | 39 | 12 | 289.2 | 70.0  | 7.40 |
| Napropamid            | 56  | 10 | 23 | 8  | 272.2 | 129.1 | 7.70 |
| Naphthylsigsaeureamid | 66  | 10 | 23 | 12 | 186.0 | 141.1 | 5.00 |
| Nicosulfuron          | 46  | 10 | 31 | 12 | 411.1 | 182.1 | 6.70 |
| Nitenpyram            | 31  | 10 | 35 | 6  | 271.2 | 126.0 | 2.00 |
| Nitralin              | 36  | 10 | 21 | 16 | 346.2 | 304.1 | 7.88 |
| Nuraimol              | 44  | 10 | 43 | 4  | 315.0 | 81.1  | 7.10 |
| Omethoat              | 36  | 10 | 19 | 12 | 214.3 | 183.0 | 1.30 |
| Oxadiazon             | 26  | 10 | 25 | 16 | 362.2 | 303.3 | 9.10 |
| Oxadixyl              | 36  | 10 | 13 | 14 | 279.2 | 219.0 | 5.00 |
| Oxamyl                | 1   | 10 | 19 | 6  | 237.3 | 71.8  | 1.80 |
| Oxamyl-oxime          | 36  | 10 | 21 | 12 | 162.9 | 72.3  | 1.00 |
| Oxydemeton-Methyl     | 36  | 10 | 21 | 14 | 247.2 | 169.0 | 2.00 |
| Oxyfluorfen           | 41  | 10 | 27 | 6  | 379.2 | 316.0 | 9.00 |
| Paclobutrazol         | 66  | 10 | 41 | 12 | 294.1 | 70.1  | 7.30 |
| Paraoxon-Ethyl        | 74  | 10 | 19 | 12 | 276.1 | 220.0 | 6.40 |
| Paraoxon-Methyl       | 54  | 10 | 35 | 6  | 248.0 | 109.1 | 5.10 |

|                                    |     |    |    |    |       |       |       |
|------------------------------------|-----|----|----|----|-------|-------|-------|
| Parathion_Methyl                   | 76  | 10 | 25 | 12 | 263.9 | 125.0 | 7.10  |
| Parathion-Ethyl                    | 49  | 10 | 21 | 14 | 292.0 | 236.1 | 8.10  |
| Penconazol                         | 41  | 10 | 39 | 8  | 284.1 | 158.9 | 8.00  |
| Pencycuron                         | 46  | 10 | 33 | 6  | 329.1 | 125.1 | 8.50  |
| Pendimethalin                      | 6   | 10 | 15 | 10 | 282.1 | 212.2 | 9.30  |
| Penthiopyrad                       | 101 | 10 | 21 | 18 | 360.0 | 276.0 | 8.10  |
| Permethrin                         | 41  | 10 | 13 | 10 | 408.2 | 355.1 | 10.20 |
| Pethoxamid                         | 56  | 10 | 29 | 24 | 296.0 | 131.0 | 7.70  |
| Phenmedipham                       | 41  | 10 | 13 | 4  | 301.3 | 168.0 | 7.00  |
| Phenothrin                         | 71  | 10 | 29 | 10 | 351.3 | 183.0 | 10.10 |
| Phenthoate                         | 36  | 10 | 17 | 14 | 321.1 | 247.0 | 8.10  |
| Phorat, -sulfon                    | 71  | 10 | 15 | 12 | 292.9 | 171.0 | 6.50  |
| Phorat, -sulfoxid                  | 76  | 10 | 13 | 14 | 277.2 | 198.8 | 6.20  |
| Phorate                            | 13  | 11 | 18 | 8  | 261.1 | 75.0  | 8.40  |
| Phosalone                          | 51  | 10 | 21 | 10 | 367.9 | 182.0 | 8.40  |
| Phosmet 1                          | 26  | 10 | 15 | 10 | 317.9 | 159.8 | 7.00  |
| Phosmet 2                          | 26  | 10 | 57 | 10 | 317.9 | 132.9 | 7.00  |
| Phosmet-oxon                       | 71  | 10 | 19 | 8  | 302.1 | 159.9 | 5.00  |
| Phoxim                             | 61  | 10 | 17 | 22 | 299.0 | 128.9 | 8.40  |
| Picoxystrobin                      | 81  | 10 | 13 | 12 | 368.2 | 205.0 | 8.00  |
| Pinoxaden                          | 131 | 10 | 29 | 14 | 400.9 | 317.1 | 8.40  |
| Piperonylbutoxid                   | 21  | 10 | 17 | 12 | 356.1 | 177.1 | 9.10  |
| Piperophos                         | 181 | 10 | 31 | 12 | 353.8 | 171.0 | 8.70  |
| Pirimicarb                         | 16  | 10 | 29 | 10 | 239.3 | 71.9  | 6.20  |
| Pirimicarb-desmethyl               | 36  | 10 | 31 | 6  | 225.3 | 71.7  | 5.00  |
| Pirimicarb-desmethyl-formamido     | 31  | 10 | 29 | 4  | 253.2 | 71.7  | 5.50  |
| Pirimiphos-Ethyl                   | 21  | 10 | 29 | 10 | 334.1 | 198.1 | 9.20  |
| Pirimiphos-Methyl                  | 24  | 10 | 29 | 8  | 306.1 | 164.1 | 8.50  |
| Prallethrin                        | 96  | 10 | 17 | 8  | 301.1 | 133.1 | 8.60  |
| Primisulfuron-methyl               | 46  | 10 | 29 | 12 | 469.1 | 254.0 | 6.30  |
| Prochloraz                         | 24  | 10 | 17 | 16 | 376.0 | 308.0 | 8.40  |
| Prochloraz-desimidazol-amino       | 71  | 10 | 23 | 28 | 327.1 | 284.0 | 8.20  |
| Prochloraz-desimidazol-formylamino | 66  | 10 | 21 | 18 | 355.0 | 310.1 | 8.20  |
| Profenofos                         | 46  | 10 | 25 | 18 | 372.9 | 302.9 | 8.80  |
| Promecarb                          | 36  | 10 | 13 | 12 | 208.3 | 150.8 | 7.10  |
| Prometryn                          | 46  | 10 | 33 | 8  | 242.2 | 158.1 | 7.70  |
| Propamocarb                        | 16  | 10 | 25 | 6  | 189.4 | 101.9 | 0.00  |
| Propaquizafop                      | 66  | 10 | 31 | 6  | 444.2 | 100.0 | 9.00  |
| Propargit                          | 4   | 10 | 21 | 8  | 368.1 | 175.1 | 9.50  |
| Propazin                           | 51  | 10 | 25 | 12 | 230.2 | 188.1 | 7.00  |
| Propetamophos                      | 26  | 10 | 23 | 8  | 282.2 | 138.0 | 7.50  |
| Propham                            | 11  | 10 | 13 | 10 | 180.3 | 138.2 | 6.30  |
| Propiconazol                       | 46  | 10 | 33 | 4  | 342.1 | 69.1  | 8.20  |
| Propisochlor                       | 56  | 10 | 13 | 14 | 283.9 | 224.0 | 8.20  |
| Propoxur                           | 31  | 10 | 21 | 10 | 210.3 | 111.1 | 5.50  |
| Propoxycarbazone sodium            | 51  | 10 | 19 | 12 | 421.0 | 180.1 | 0.00  |

|                                |     |    |    |    |       |       |       |
|--------------------------------|-----|----|----|----|-------|-------|-------|
| Propyzamid                     | 39  | 10 | 31 | 8  | 256.0 | 173.1 | 7.40  |
| Proquinazid                    | 66  | 10 | 21 | 10 | 373.0 | 330.8 | 9.60  |
| Prosulfocarb                   | 36  | 10 | 29 | 4  | 252.1 | 91.2  | 8.80  |
| Prosulfuron                    | 46  | 10 | 31 | 14 | 420.2 | 141.0 | 5.80  |
| Prothioconazol-Desthio         | 61  | 10 | 47 | 12 | 312.1 | 70.0  | 7.80  |
| Prothiofos                     | 46  | 10 | 25 | 22 | 344.9 | 240.9 | 9.90  |
| Pymetrozin                     | 31  | 10 | 31 | 10 | 218.3 | 105.0 | 2.00  |
| Pyraclostrobin                 | 66  | 10 | 17 | 10 | 388.2 | 194.1 | 8.30  |
| Pyraflufen-ethyl               | 91  | 10 | 29 | 8  | 415.0 | 341.0 | 8.30  |
| Pyrazophos                     | 61  | 10 | 29 | 12 | 374.1 | 222.1 | 8.50  |
| Pyrazosulfuron-ethyl           | 46  | 10 | 23 | 12 | 415.2 | 182.0 | 5.50  |
| Pyrethrin I                    | 66  | 10 | 13 | 10 | 329.1 | 160.8 | 9.50  |
| Pyrethrin II                   | 76  | 10 | 15 | 10 | 373.0 | 160.8 | 8.70  |
| Pyridaben                      | 31  | 10 | 19 | 16 | 365.2 | 309.1 | 9.80  |
| Pyridalyl                      | 61  | 10 | 41 | 20 | 492.0 | 110.9 | 10.90 |
| Pyridaphenthion                | 76  | 10 | 31 | 12 | 341.1 | 188.9 | 7.50  |
| Pyridat (Metabolit)            | 36  | 10 | 29 | 12 | 207.0 | 104.0 | 2.50  |
| Pyridate                       | 36  | 10 | 29 | 12 | 379.2 | 207.0 | 10.50 |
| Pyrifenox                      | 16  | 10 | 31 | 4  | 295.0 | 93.1  | 7.80  |
| Pyrimethanil                   | 41  | 10 | 35 | 10 | 200.2 | 107.0 | 7.00  |
| Pyrimidifen                    | 96  | 10 | 33 | 34 | 378.2 | 184.1 | 9.10  |
| Pyriproxifen                   | 14  | 10 | 21 | 4  | 322.1 | 96.2  | 9.10  |
| Quinalphos                     | 36  | 10 | 29 | 12 | 299.1 | 97.1  | 8.10  |
| Quinclorac                     | 66  | 10 | 55 | 12 | 242.1 | 161.1 | 2.40  |
| Quinmerac                      | 26  | 10 | 21 | 12 | 222.2 | 203.8 | 2.00  |
| Quinoxifen                     | 21  | 10 | 57 | 8  | 307.9 | 162.0 | 9.20  |
| Quizalofop free acid           | 66  | 10 | 27 | 16 | 345.2 | 299.1 | 6.50  |
| Quizalofop-ethyl               | 61  | 10 | 29 | 14 | 373.0 | 299.0 | 8.90  |
| Quizalofop-p-tefuryl           | 146 | 10 | 29 | 18 | 429.0 | 299.0 | 8.80  |
| Resmethrin                     | 76  | 10 | 21 | 12 | 339.3 | 171.0 | 10.00 |
| Rimsulfuron                    | 51  | 10 | 29 | 14 | 432.1 | 182.0 | 3.50  |
| Rotenone                       | 71  | 10 | 33 | 12 | 395.1 | 213.1 | 7.90  |
| Saflufenacil                   | 96  | 10 | 61 | 10 | 501.2 | 198.0 | 6.40  |
| Sebuthylazine                  | 61  | 10 | 25 | 10 | 230.3 | 174.0 | 7.00  |
| Sedaxan                        | 111 | 10 | 17 | 16 | 332.1 | 312.0 | 7.50  |
| Sethoxydim                     | 41  | 10 | 29 | 14 | 328.3 | 177.9 | 8.30  |
| Simazin                        | 66  | 10 | 37 | 6  | 202.2 | 132.1 | 5.50  |
| Spinetoram J                   | 96  | 10 | 47 | 14 | 748.4 | 142.2 | 10.00 |
| Spinetoram L                   | 101 | 10 | 43 | 26 | 760.5 | 142.2 | 10.30 |
| Spinosyn A                     | 61  | 10 | 41 | 10 | 732.3 | 141.9 | 9.70  |
| Spinosyn D                     | 61  | 10 | 45 | 14 | 746.5 | 142.0 | 10.00 |
| Spirodiclofen                  | 151 | 10 | 29 | 8  | 411.0 | 71.1  | 9.70  |
| Spirotetramat                  | 61  | 10 | 25 | 6  | 374.3 | 302.2 | 7.70  |
| Spirotetramat-cis-Keto-Hydroxy | 71  | 10 | 37 | 12 | 318.2 | 214.1 | 6.50  |
| Spirotetramat-Enol             | 96  | 10 | 39 | 20 | 302.2 | 216.1 | 5.50  |
| Spirotetramat-Enol-Glucosid 1  | 56  | 10 | 21 | 8  | 464.3 | 302.2 | 3.60  |



|                               |     |    |    |    |       |       |       |
|-------------------------------|-----|----|----|----|-------|-------|-------|
| Spirotetramat-Enol-Glucosid 2 | 56  | 10 | 63 | 12 | 464.3 | 216.1 | 3.60  |
| Spirotetramat-Mono-Hydroxy    | 71  | 10 | 27 | 14 | 304.2 | 254.1 | 5.40  |
| Spiroxamine                   | 51  | 10 | 29 | 12 | 298.4 | 144.1 | 7.80  |
| Sulcotrione                   | 51  | 10 | 25 | 8  | 329.1 | 138.7 | 1.50  |
| Sulfosulfuron                 | 31  | 10 | 19 | 12 | 471.1 | 211.0 | 4.20  |
| Sulfotep                      | 41  | 10 | 21 | 10 | 323.1 | 171.0 | 8.20  |
| tau-Fluvalinat                | 46  | 10 | 47 | 14 | 520.1 | 181.0 | 10.10 |
| tau-Fluvalinat 2              | 31  | 10 | 23 | 4  | 520.1 | 208.1 | 10.10 |
| Tebuconazol                   | 51  | 10 | 37 | 6  | 308.2 | 69.7  | 8.10  |
| Tebufenozid                   | 21  | 10 | 13 | 10 | 353.3 | 297.2 | 8.00  |
| Tebufenpyrad                  | 101 | 10 | 49 | 10 | 334.1 | 117.2 | 9.00  |
| Tebutam                       | 16  | 10 | 33 | 16 | 234.2 | 91.1  | 7.90  |
| Tebuthiuron                   | 66  | 10 | 25 | 12 | 229.0 | 171.9 | 5.60  |
| Tembotrion                    | 96  | 10 | 15 | 8  | 441.1 | 341.1 | 4.60  |
| Tepraloxydim                  | 56  | 10 | 19 | 14 | 342.1 | 250.1 | 6.30  |
| Terbufos                      | 21  | 10 | 13 | 18 | 289.1 | 103.0 | 9.00  |
| Terbufossulfon                | 36  | 10 | 23 | 10 | 339.7 | 171.1 | 7.10  |
| Terbufossulfoxid              | 61  | 10 | 17 | 10 | 304.9 | 186.9 | 7.30  |
| Terbumeton                    | 36  | 10 | 25 | 10 | 226.2 | 170.1 | 7.10  |
| Terbuthylazin                 | 51  | 10 | 25 | 12 | 230.1 | 173.9 | 7.20  |
| Terbutryn                     | 41  | 10 | 27 | 10 | 242.2 | 186.1 | 7.70  |
| Tetrachlorvinphos             | 51  | 10 | 21 | 6  | 367.0 | 127.0 | 8.00  |
| Tetraconazol                  | 81  | 10 | 43 | 10 | 372.2 | 158.9 | 7.70  |
| Tetramethrin                  | 21  | 10 | 29 | 10 | 349.3 | 164.1 | 8.80  |
| Thiabendazol                  | 56  | 10 | 37 | 12 | 202.1 | 175.0 | 5.00  |
| Thiabendazol-5-hydroxy        | 66  | 10 | 35 | 14 | 218.2 | 191.0 | 3.80  |
| Thiacloprid                   | 41  | 10 | 29 | 8  | 253.1 | 125.7 | 4.40  |
| Thiamethoxam                  | 36  | 10 | 17 | 18 | 292.2 | 211.1 | 2.00  |
| Thifensulfuron-methyl         | 36  | 10 | 21 | 18 | 387.9 | 167.0 | 3.00  |
| Thiobencarb                   | 56  | 10 | 67 | 14 | 258.0 | 88.9  | 8.40  |
| Thiocyclam                    | 51  | 10 | 23 | 8  | 182.0 | 136.7 | 4.70  |
| Thiodicarb                    | 31  | 10 | 31 | 8  | 355.0 | 88.0  | 6.20  |
| Thiofanox                     | 11  | 10 | 15 | 4  | 219.5 | 57.1  | 5.90  |
| Thiofanox sulfon              | 61  | 10 | 25 | 10 | 251.1 | 57.0  | 3.70  |
| Thiofanox sulfoxid            | 16  | 10 | 19 | 10 | 252.2 | 103.8 | 3.00  |
| Thiophanat-methyl             | 36  | 10 | 37 | 4  | 343.0 | 150.8 | 5.50  |
| Tolclofos-Methyl              | 44  | 10 | 23 | 16 | 301.0 | 268.9 | 8.50  |
| Tolfenpyrad                   | 71  | 10 | 39 | 12 | 384.1 | 197.1 | 9.00  |
| Tolyfluanid                   | 9   | 10 | 19 | 12 | 364.0 | 237.9 | 8.50  |
| Tralkoxydim                   | 51  | 10 | 29 | 26 | 330.2 | 138.1 | 7.40  |
| Triadimefon                   | 36  | 10 | 21 | 10 | 294.0 | 197.2 | 7.50  |
| Triadimenol                   | 36  | 10 | 31 | 12 | 296.1 | 69.9  | 7.50  |
| Triadimenol 2                 | 36  | 10 | 13 | 14 | 296.1 | 227.0 | 7.50  |
| Triasulfuron                  | 46  | 10 | 29 | 12 | 402.1 | 167.0 | 4.60  |
| Triazamat                     | 34  | 10 | 33 | 10 | 315.1 | 72.1  | 7.70  |
| Triazophos                    | 31  | 10 | 47 | 6  | 314.1 | 119.1 | 7.50  |

|                       |    |    |    |    |       |       |       |
|-----------------------|----|----|----|----|-------|-------|-------|
| Triazophos 2          | 61 | 10 | 29 | 12 | 314.0 | 162.1 | 7.50  |
| Triazoxide            | 86 | 10 | 53 | 12 | 248.0 | 68.0  | 6.60  |
| Tribenuron-methyl     | 46 | 10 | 21 | 8  | 396.1 | 155.0 | 5.30  |
| Trichlorfon           | 46 | 10 | 33 | 18 | 274.0 | 109.0 | 3.70  |
| Tricyclazol           | 91 | 10 | 33 | 30 | 190.1 | 163.0 | 4.70  |
| Tridemorph            | 96 | 10 | 37 | 10 | 298.4 | 130.2 | 10.50 |
| Trifloxystrobin       | 21 | 10 | 23 | 10 | 409.1 | 186.1 | 8.70  |
| Triflumizol           | 6  | 10 | 17 | 10 | 346.0 | 278.0 | 8.70  |
| Triflumizol-Metabolit | 66 | 10 | 47 | 6  | 295.0 | 43.4  | 7.50  |
| Triflusulfuron-methyl | 46 | 10 | 31 | 12 | 493.1 | 264.1 | 6.60  |
| Triforin              | 26 | 10 | 15 | 10 | 435.0 | 389.8 | 6.80  |
| Triticonazol          | 96 | 10 | 21 | 8  | 318.1 | 70.0  | 7.60  |
| Tritosulfuron         | 81 | 10 | 29 | 12 | 446.1 | 195.0 | 5.50  |
| Valiphenal            | 81 | 10 | 53 | 8  | 399.1 | 155.1 | 7.50  |
| Vamidothion           | 26 | 10 | 19 | 12 | 288.2 | 145.8 | 3.50  |
| Zoxamid               | 65 | 10 | 35 | 4  | 336.2 | 187.1 | 8.20  |

5

6 **B. Negative ESI**

| Compound                  | DP (v) | EP (v) | CE (v) | CXP (v) | Q1 (g/mol) | Q2 (g/mol) | Retention Time (min) |
|---------------------------|--------|--------|--------|---------|------------|------------|----------------------|
| CAP (Internal Standard)   | -65.0  | -10.0  | -24.0  | -11.0   | 321.0      | 152.1      | 3.50                 |
| 2- Naphthoxyacetic acid 1 | -105.0 | -10.0  | -18.0  | -13.0   | 200.9      | 142.9      | 3.80                 |
| 2 -Naphthoxyacetic acid 2 | -105.0 | -10.0  | -50.0  | -11.0   | 200.9      | 115.0      | 3.80                 |
| 2,4-D 1                   | -19.0  | -10.0  | -14.0  | -10.0   | 219.0      | 160.9      | 3.80                 |
| 2,4-D 2                   | -19.0  | -10.0  | -34.0  | -26.0   | 219.0      | 124.9      | 3.80                 |
| 2,4-DB 1                  | -64.0  | -10.0  | -12.0  | -10.0   | 247.0      | 160.8      | 3.90                 |
| 2,4-DB 2                  | -64.0  | -10.0  | -34.0  | -10.0   | 247.0      | 124.9      | 3.90                 |
| 2-Naphthylacetic acid     | -50.0  | -10.0  | -11.0  | -12.0   | 185.0      | 140.8      | 3.80                 |
| 4-CPA 1                   | -71.0  | -10.0  | -18.0  | -10.0   | 185.0      | 126.8      | 3.70                 |
| 4-CPA 2                   | -71.0  | -10.0  | -12.0  | -26.0   | 185.0      | 140.8      | 3.70                 |
| Bentazon 1                | -56.0  | -10.0  | -32.0  | -10.0   | 239.1      | 132.0      | 3.70                 |
| Bentazon 2                | -56.0  | -10.0  | -24.0  | -12.0   | 239.1      | 197.0      | 3.70                 |
| Bromoxynyl 1              | -51.0  | -10.0  | -36.0  | -14.0   | 273.9      | 79.0       | 3.80                 |
| Bromoxynyl 2              | -51.0  | -10.0  | -40.0  | -12.0   | 277.9      | 80.9       | 3.80                 |
| Chlorfluazuron 1          | -66.0  | -10.0  | -30.0  | -14.0   | 538.0      | 517.9      | 4.40                 |
| Chlorfluazuron 2          | -54.0  | -10.0  | -28.0  | -12.0   | 538.0      | 354.9      | 4.40                 |
| Clethodim                 | -54.0  | -10.0  | -14.0  | -14.0   | 358.1      | 238.1      | 4.00                 |
| Cyantranilipol 1          | -80.0  | -10.0  | -18.0  | -11.0   | 472.7      | 203.8      | 3.70                 |
| Cyantranilipol 2          | -80.0  | -10.0  | -18.0  | -13.0   | 472.7      | 201.8      | 3.70                 |
| Cyclanilid 1              | -65.0  | -10.0  | -28.0  | -11.0   | 271.9      | 159.9      | 4.20                 |
| Cyclanilid 2              | -65.0  | -10.0  | -16.0  | -15.0   | 271.9      | 227.9      | 4.20                 |
| Cycloxydim 1              | -61.0  | -10.0  | -68.0  | -12.0   | 324.2      | 235.9      | 4.20                 |
| Cycloxydim 2              | -61.0  | -10.0  | -68.0  | -12.0   | 324.2      | 133.8      | 4.20                 |
| Dicamba 1                 | -21.0  | -10.0  | -6.0   | -12.0   | 219.0      | 175.0      | 3.80                 |
| Dicamba 2                 | -21.0  | -10.0  | -14.0  | -10.0   | 219.0      | 144.8      | 3.80                 |

|                       |       |       |        |       |       |       |      |
|-----------------------|-------|-------|--------|-------|-------|-------|------|
| Dichloran 1           | -66.0 | -10.0 | -20.0  | -7.0  | 205.0 | 175.0 | 4.00 |
| Dichloran 2           | -66.0 | -10.0 | -24.0  | -7.0  | 205.0 | 168.9 | 4.00 |
| Dichlorprop 1         | -26.0 | -10.0 | -14.0  | -12.0 | 233.0 | 161.0 | 3.90 |
| Dichlorprop 2         | -26.0 | -10.0 | -34.0  | -26.0 | 233.0 | 125.1 | 3.90 |
| Diflubenzuron 1       | -31.0 | -10.0 | -12.0  | -7.0  | 308.9 | 288.9 | 4.00 |
| Diflubenzuron 2       | -31.0 | -10.0 | -14.0  | -7.0  | 308.9 | 155.9 | 4.00 |
| Diflubenzuron 3       | -31.0 | -10.0 | -68.0  | -7.0  | 308.9 | 92.9  | 4.00 |
| Dinocap 1             | -95.0 | -10.0 | -42.0  | -13.0 | 295.0 | 208.7 | 4.50 |
| Dinocap 2             | -95.0 | -10.0 | -72.0  | -7.0  | 295.0 | 133.7 | 4.50 |
| Dinoseb 1             | -36.0 | -10.0 | -52.0  | -14.0 | 239.1 | 134.0 | 4.20 |
| Dinoseb 2             | -36.0 | -10.0 | -30.0  | -12.0 | 239.1 | 193.0 | 4.20 |
| Dinoterb 1            | -49.0 | -10.0 | -24.0  | -16.0 | 239.1 | 207.0 | 4.20 |
| Dinoterb 2            | -49.0 | -10.0 | -24.0  | -14.0 | 239.1 | 176.0 | 4.20 |
| Dithianon 1           | -24.0 | -10.0 | -24.0  | -10.0 | 296.0 | 264.0 | 4.00 |
| Dithianon 2           | -24.0 | -10.0 | -28.0  | -20.0 | 296.0 | 238.0 | 4.00 |
| DNOC 1                | -26.0 | -10.0 | -24.0  | -18.0 | 197.0 | 137.0 | 3.90 |
| DNOC 2                | -26.0 | -10.0 | -28.0  | -6.0  | 197.0 | 108.8 | 3.90 |
| Endosulfansulfat 1    | -69.0 | -10.0 | -38.0  | -18.0 | 420.8 | 96.8  | 4.10 |
| Endosulfansulfat 2    | -69.0 | -10.0 | -130.0 | -6.0  | 420.8 | 79.9  | 4.10 |
| Fipronil 1            | -34.0 | -10.0 | -18.0  | -22.0 | 435.0 | 330.0 | 4.10 |
| Fipronil 2            | -34.0 | -10.0 | -38.0  | -18.0 | 435.0 | 250.0 | 4.10 |
| Fipronil-Desulfinyl 1 | -54.0 | -10.0 | -34.0  | -16.0 | 387.0 | 351.0 | 4.10 |
| Fipronil-Desulfinyl 2 | -54.0 | -10.0 | -16.0  | -24.0 | 387.0 | 282.0 | 4.10 |
| Fipronil-Sulfid 1     | -16.0 | -10.0 | -34.0  | -18.0 | 419.0 | 262.0 | 4.10 |
| Fipronil-Sulfid 2     | -16.0 | -10.0 | -20.0  | -26.0 | 419.0 | 383.0 | 4.10 |
| Fipronil-Sulfon 1     | -24.0 | -10.0 | -18.0  | -16.0 | 451.0 | 282.0 | 4.20 |
| Fipronil-Sulfon 2     | -24.0 | -10.0 | -50.0  | -8.0  | 451.0 | 415.0 | 4.20 |
| Fluazifop free acid 1 | -31.0 | -10.0 | -18.0  | -26.0 | 326.1 | 253.8 | 3.90 |
| Fluazifop free acid 2 | -31.0 | -10.0 | -50.0  | -24.0 | 326.1 | 108.1 | 3.90 |
| Fluazinam 1           | -56.0 | -10.0 | -40.0  | -9.0  | 462.9 | 415.8 | 4.30 |
| Fluazinam 2           | -56.0 | -10.0 | -40.0  | -7.0  | 462.9 | 397.9 | 4.30 |
| Flubendiamid 1        | -90.0 | -10.0 | -40.0  | -1.0  | 681.0 | 253.9 | 4.00 |
| Flubendiamid 2        | -90.0 | -10.0 | -24.0  | -13.0 | 681.0 | 273.9 | 4.00 |
| Fludioxonil 1         | -56.0 | -10.0 | -44.0  | -9.0  | 247.0 | 179.9 | 3.90 |
| Fludioxonil 2         | -56.0 | -10.0 | -54.0  | -11.0 | 247.0 | 126.0 | 3.90 |
| Gibberilic Acid 1     | -90.0 | -10.0 | -46.0  | -7.0  | 344.9 | 142.7 | 3.20 |
| Gibberilic Acid 2     | -90.0 | -10.0 | -22.0  | -15.0 | 344.9 | 238.9 | 3.20 |
| Haloxifop free acid 1 | -90.0 | -10.0 | -22.0  | -19.0 | 359.8 | 287.8 | 4.00 |
| Haloxifop free acid 2 | -90.0 | -10.0 | -54.0  | -11.0 | 359.8 | 195.7 | 4.00 |
| Haloxifop free acid 4 | -90.0 | -10.0 | -36.0  | -13.0 | 359.8 | 251.8 | 4.00 |
| Hexaflumuron 1        | -41.0 | -10.0 | -26.0  | -7.0  | 458.9 | 438.8 | 4.20 |
| Hexaflumuron 3        | -41.0 | -10.0 | -26.0  | -9.0  | 458.9 | 275.7 | 4.20 |
| Ioxynil 1             | -46.0 | -10.0 | -36.0  | -10.0 | 369.8 | 126.8 | 3.80 |
| Ioxynil 2             | -46.0 | -10.0 | -26.0  | -14.0 | 369.8 | 214.9 | 3.80 |
| Iprodion              | -74.0 | -10.0 | -20.0  | -10.0 | 328.0 | 141.1 | 4.20 |
| Lufenuron 1           | -90.0 | -10.0 | -16.0  | -29.0 | 510.7 | 340.9 | 4.30 |

|                    |        |       |       |       |       |       |      |
|--------------------|--------|-------|-------|-------|-------|-------|------|
| Lufenuron 2        | -90.0  | -10.0 | -50.0 | -15.0 | 510.7 | 176.8 | 4.30 |
| MCPA 1             | -29.0  | -10.0 | -10.0 | -10.0 | 198.9 | 140.8 | 3.80 |
| MCPA 2             | -55.0  | -10.0 | -40.0 | -9.0  | 198.8 | 104.9 | 3.80 |
| MCPA 3             | -140.0 | -10.0 | -40.0 | -15.0 | 201.0 | 143.0 | 3.80 |
| MCPB 1             | -51.0  | -10.0 | -14.0 | -26.0 | 227.0 | 140.9 | 4.00 |
| MCPB 2             | -26.0  | -10.0 | -36.0 | -1.0  | 227.0 | 104.8 | 4.00 |
| Mecoprop-P 1       | -51.0  | -10.0 | -22.0 | -9.0  | 213.0 | 140.7 | 3.90 |
| Mecoprop-P 2       | -51.0  | -10.0 | -14.0 | -9.0  | 213.0 | 71.0  | 3.90 |
| Meptyldinocap 1    | -20.0  | -10.0 | -40.0 | -19.0 | 295.0 | 193.0 | 4.50 |
| Meptyldinocap 2    | -20.0  | -10.0 | -34.0 | -19.0 | 295.0 | 193.9 | 4.50 |
| Metaflumizone 1    | -150.0 | -10.0 | -24.0 | -13.0 | 505.0 | 302.1 | 4.30 |
| Metaflumizone 2    | -150.0 | -10.0 | -74.0 | -19.0 | 505.0 | 285.0 | 4.30 |
| Methoxyfenozid     | -66.0  | -10.0 | -30.0 | -26.0 | 367.2 | 148.8 | 3.80 |
| Novaluron 1        | -55.0  | -10.0 | -18.0 | -21.0 | 490.9 | 471.0 | 4.20 |
| Novaluron 2        | -55.0  | -10.0 | -20.0 | -15.0 | 490.9 | 305.0 | 4.20 |
| Picloram 1         | -60.0  | -10.0 | -14.0 | -21.0 | 240.8 | 196.8 | 3.40 |
| Picloram 2         | -60.0  | -10.0 | -30.0 | -9.0  | 240.8 | 122.8 | 3.40 |
| Prohexadion 1      | -21.0  | -10.0 | -16.0 | -18.0 | 211.1 | 123.1 | 3.60 |
| Prohexadion 2      | -21.0  | -10.0 | -16.0 | -46.0 | 211.1 | 166.9 | 3.60 |
| Prothioconazol 1   | -80.0  | -10.0 | -32.0 | -7.0  | 343.9 | 99.9  | 4.00 |
| Prothioconazol 2   | -80.0  | -10.0 | -84.0 | -1.0  | 343.9 | 57.9  | 4.00 |
| Quizalifop 1       | -54.0  | -10.0 | -30.0 | -18.0 | 343.1 | 270.9 | 4.00 |
| Quizalifop 2       | -54.0  | -10.0 | -44.0 | -12.0 | 343.1 | 242.9 | 4.00 |
| Sulfentrazon 1     | -100.0 | -10.0 | -34.0 | -15.0 | 385.0 | 307.0 | 3.70 |
| Sulfentrazon 2     | -100.0 | -10.0 | -52.0 | -9.0  | 385.0 | 198.9 | 3.70 |
| Teflubenzuron 1    | -26.0  | -10.0 | -10.0 | -9.0  | 379.1 | 338.7 | 4.30 |
| Teflubenzuron 2    | -26.0  | -10.0 | -18.0 | -7.0  | 379.1 | 195.9 | 4.30 |
| TFNA 1             | -45.0  | -10.0 | -16.0 | -7.0  | 189.8 | 145.7 | 3.40 |
| TFNA 2             | -45.0  | -10.0 | -46.0 | -11.0 | 189.8 | 68.9  | 3.40 |
| TFNA 3             | -45.0  | -10.0 | -36.0 | -23.0 | 189.8 | 126.0 | 3.40 |
| TFNG 1             | -60.0  | -10.0 | -18.0 | -11.0 | 246.8 | 182.7 | 3.10 |
| TFNG 2             | -60.0  | -10.0 | -26.0 | -9.0  | 246.8 | 162.7 | 3.10 |
| TFNG 3             | -60.0  | -10.0 | -32.0 | -9.0  | 246.8 | 134.8 | 3.10 |
| Triclopyr 1        | -50.0  | -10.0 | -16.0 | -11.0 | 253.9 | 195.7 | 3.80 |
| Triclopyr 2        | -50.0  | -10.0 | -8.0  | -11.0 | 253.9 | 217.9 | 3.80 |
| Triflumuron 1      | -50.0  | -10.0 | -18.0 | -6.0  | 357.0 | 153.9 | 4.10 |
| Triflumuron 2      | -50.0  | -10.0 | -52.0 | -6.0  | 357.0 | 85.3  | 4.10 |
| Trinexapac-ethyl   | -75.0  | -10.0 | -28.0 | -7.0  | 251.0 | 136.8 | 3.80 |
| Trinexapac-ethyl 2 | -75.0  | -10.0 | -26.0 | -7.0  | 251.0 | 132.9 | 3.80 |
| Halosulfuron-Me 1  | -75.0  | -10.0 | -26.0 | -1.0  | 433.0 | 251.9 | 4.10 |
| Halosulfuron-Me 2  | -75.0  | -10.0 | -38.0 | -7.0  | 433.0 | 154.0 | 4.10 |
| Fomesafen 1 e      | -95.0  | -10.0 | -50.0 | -9.0  | 437.0 | 194.9 | 4.10 |
| Fomesafen 2 e      | -95.0  | -10.0 | -44.0 | -11.0 | 437.0 | 221.8 | 4.10 |
| Metamitron 1       | -75.0  | -10.0 | -28.0 | -9.0  | 201.0 | 117.1 | 3.30 |
| Metamitron 2       | -75.0  | -10.0 | -18.0 | -11.0 | 201.0 | 185.0 | 3.30 |
| Azadirachtin 1     | -105.0 | -10.0 | -22.0 | -5.0  | 719.2 | 485.1 | 3.70 |

|                               |        |       |       |       |       |       |      |
|-------------------------------|--------|-------|-------|-------|-------|-------|------|
| Azadirachtin 2                | -110.0 | -10.0 | -52.0 | -6.0  | 719.2 | 99.0  | 3.70 |
| Acephat 1                     | -75.0  | -10.0 | -16.0 | -9.0  | 181.9 | 140.9 | 0.00 |
| Acephat 2                     | -75.0  | -10.0 | -30.0 | -7.0  | 181.9 | 79.0  | 0.00 |
| Sulfoxaflor 1                 | -70.0  | -10.0 | -22.0 | -11.0 | 275.9 | 211.7 | 3.40 |
| Sulfoxaflor 2                 | -70.0  | -10.0 | -22.0 | -9.0  | 275.9 | 212.9 | 3.40 |
| Saflufenacil 1                | -105.0 | -10.0 | -52.0 | -17.0 | 499.1 | 328.0 | 3.80 |
| Saflufenacil 2                | -105.0 | -10.0 | -40.0 | -3.0  | 499.1 | 347.8 | 3.80 |
| Aminopyralid 2                | -50.0  | -10.0 | -14.0 | -7.0  | 204.9 | 160.8 | 1.30 |
| Aminopyralid 3                | -50.0  | -10.0 | -14.0 | -7.0  | 206.9 | 162.9 | 1.30 |
| Diuron 1                      | -65.0  | -10.0 | -32.0 | -9.0  | 231.0 | 149.8 | 3.80 |
| Diuron 2                      | -65.0  | -10.0 | -24.0 | -9.0  | 231.0 | 185.8 | 3.80 |
| Daminozid 1                   | -45.0  | -10.0 | -14.0 | -7.0  | 159.0 | 140.9 | 1.20 |
| Daminozid 2                   | -45.0  | -10.0 | -20.0 | -5.0  | 159.0 | 96.8  | 1.20 |
| Sedaxan 1                     | -90.0  | -10.0 | -36.0 | -5.0  | 330.0 | 111.0 | 3.80 |
| Sedaxan 2                     | -90.0  | -10.0 | -30.0 | -5.0  | 330.0 | 131.0 | 3.80 |
| Dalapon 1                     | -30.0  | -10.0 | -10.0 | -10.0 | 141.0 | 105.0 | 3.40 |
| Dalapon 2                     | -30.0  | -10.0 | -12.0 | -12.0 | 141.0 | 97.0  | 3.40 |
| Dichlorophen 1                | -100.0 | -10.0 | -30.0 | -9.0  | 266.8 | 127.0 | 3.90 |
| Dichlorophen 2                | -100.0 | -10.0 | -84.0 | -15.0 | 266.8 | 35.0  | 3.90 |
| Chlorbufam 1                  | -40.0  | -10.0 | -10.0 | -9.0  | 221.9 | 177.9 | 3.80 |
| Chlorbufam 2                  | -40.0  | -10.0 | -12.0 | -7.0  | 221.9 | 175.9 | 3.80 |
| Acifluorfen 1                 | -45.0  | -10.0 | -22.0 | -7.0  | 359.9 | 285.5 | 4.20 |
| Acifluorfen 2                 | -45.0  | -10.0 | -12.0 | -9.0  | 359.9 | 315.8 | 4.20 |
| Fluoxypyr 1                   | -50.0  | -10.0 | -10.0 | -1.0  | 252.9 | 232.8 | 3.60 |
| Fluoxypyr 2                   | -50.0  | -10.0 | -20.0 | -9.0  | 252.9 | 194.8 | 3.60 |
| Imazamox 1                    | -90.0  | -10.0 | -10.0 | -18.0 | 304.0 | 260.1 | 3.40 |
| Imazamox 2                    | -90.0  | -10.0 | -44.0 | -13.0 | 304.0 | 186.0 | 3.40 |
| Asulam 1                      | -50.0  | -10.0 | -22.0 | -19.0 | 228.9 | 196.8 | 2.90 |
| Asulam 2                      | -50.0  | -10.0 | -26.0 | -9.0  | 228.9 | 105.8 | 2.90 |
| Acibenzolar acid 1            | -50.0  | -10.0 | -28.0 | -5.0  | 178.8 | 106.8 | 3.70 |
| Acibenzolar acid 2            | -50.0  | -10.0 | -16.0 | -7.0  | 178.8 | 134.9 | 3.70 |
| Fenoprop 1                    | -50.0  | -10.0 | -40.0 | -22.0 | 267.0 | 159.0 | 3.90 |
| Fenoprop 2                    | -50.0  | -10.0 | -40.0 | -22.0 | 267.0 | 195.0 | 3.90 |
| 2-4-5-T 1                     | -50.0  | -10.0 | -40.0 | -22.0 | 253.0 | 159.0 | 3.90 |
| 2-4-5-T 2                     | -50.0  | -10.0 | -40.0 | -22.0 | 253.0 | 195.0 | 3.90 |
| Quinclorac 1                  | -30.0  | -10.0 | -10.0 | -11.0 | 239.9 | 195.9 | 3.60 |
| Mesotrione 1                  | -50.0  | -10.0 | -14.0 | -19.0 | 338.1 | 290.9 | 3.60 |
| Mesotrione 2                  | -50.0  | -10.0 | -44.0 | -15.0 | 338.1 | 212.0 | 3.60 |
| (Internal Standard) Diuron D6 | -135.0 | -10.0 | -26.0 | -13.0 | 236.9 | 185.8 | 3.80 |
| Benzovindiflupyr 1            | -165.0 | -10.0 | -30.0 | -9.0  | 398.0 | 369.9 | 4.00 |
| Benzovindiflupyr 2            | -165.0 | -10.0 | -66.0 | -13.0 | 398.0 | 90.9  | 4.00 |
| Bromacil 1                    | -95.0  | -10.0 | -28.0 | -11.0 | 259.0 | 202.9 | 3.70 |
| Bromacil 2                    | -95.0  | -10.0 | -46.0 | -1.0  | 259.0 | 78.9  | 3.70 |
| Bentazon-6-OH 1               | -100.0 | -10.0 | -26.0 | -17.0 | 254.9 | 190.8 | 3.60 |
| Bentazon-6-OH 2               | -100.0 | -10.0 | -34.0 | -17.0 | 254.9 | 147.8 | 3.60 |
| Bentazon-8-OH 1               | -100.0 | -10.0 | -26.0 | -17.0 | 254.9 | 191.0 | 3.60 |

Bentazon-8-OH 2

-100.0

-10.0

-34.0

-17.0

254.9

148.0

3.60

---

7

8

9

10

11

12

13

14

15

16

17

18

19

20

21

22

23

24

25

26

27

28

29

30

31

32

33

34

35
