# Supplementary material for: Pesticide distribution and depletion kinetic determination in honey and beeswax: Model for pesticide occurrence and distribution in beehive products
Source: PubMed Central journal article supplement (PMC6382162; doi:10.1371/journal.pone.0212631), 2019-02-20
Supplement: pone.0212631.s002.pdf [file pone.0212631.s002.pdf]

1 **S2 Table. MRM transition and optimized parameters for the pesticides analyzed**  
 2 **by GC-MS/MS with positive EI ionization.**

| ID                | Precursor Ion<br>(g/mol) | Product Ion<br>(g/mol) | Dwell time<br>(msec) | Collision Energy<br>(v) | Retention time<br>(min) |
|-------------------|--------------------------|------------------------|----------------------|-------------------------|-------------------------|
| Aldrin            | 263                      | 193                    | 60                   | 30                      | 18.42                   |
|                   | 263                      | 191                    | 60                   | 30                      |                         |
|                   | 217                      | 173.1                  | 10                   | 15                      |                         |
| Azaconazole       | 217                      | 145                    | 10                   | 35                      | 24.53                   |
|                   | 217                      | 109.1                  | 10                   | 35                      |                         |
|                   | 292.1                    | 264                    | 10                   | 10                      |                         |
| Benfluralin       | 292.1                    | 160.1                  | 10                   | 20                      | 11.66                   |
|                   | 292.1                    | 105.2                  | 10                   | 15                      |                         |
|                   | 154                      | 102                    | 15                   | 30                      |                         |
| Biphenyl          | 153.9                    | 153.2                  | 15                   | 20                      | 7.08                    |
|                   | 153.9                    | 152.2                  | 15                   | 25                      |                         |
|                   | 358.7                    | 242.2                  | 10                   | 20                      |                         |
| Bromocyclen       | 358.7                    | 143.1                  | 10                   | 20                      | 15.11                   |
|                   | 358.7                    | 242.2                  | 10                   | 20                      |                         |
| Bromocyclen       | 358.7                    | 143.1                  | 10                   | 20                      | 15.11                   |
|                   | 358.7                    | 143.1                  | 10                   | 20                      |                         |
| Bromophos-ethyl   | 358.9                    | 284.8                  | 10                   | 35                      | 22.47                   |
| Bromophos-ethyl   | 358.7                    | 331                    | 10                   | 4                       |                         |
| Bromophos-ethyl   | 358.7                    | 303                    | 10                   | 14                      |                         |
| Bromophos-methyl  | 330.9                    | 315.9                  | 10                   | 20                      | 20.00                   |
| Bromophos-methyl  | 330.9                    | 285.9                  | 10                   | 34                      |                         |
| Bromophos-methyl  | 329                      | 314                    | 10                   | 12                      |                         |
| Bromopropylate    | 341                      | 185                    | 10                   | 20                      | 28.64                   |
| Bromopropylate    | 341                      | 183                    | 10                   | 20                      |                         |
| Bromopropylate    | 183                      | 155                    | 10                   | 15                      |                         |
| Bromopropylate    | 183                      | 76                     | 10                   | 35                      | 28.02                   |
| Captafol          | 151                      | 80                     | 10                   | 10                      |                         |
| Captafol          | 151                      | 79                     | 10                   | 15                      |                         |
| Captafol          | 79                       | 77                     | 10                   | 10                      | 21.18                   |
| Captan            | 151                      | 80                     | 10                   | 10                      |                         |
| Captan            | 151                      | 79                     | 10                   | 15                      |                         |
| Captan            | 79                       | 77                     | 10                   | 10                      | 21.86                   |
| Chinomethionat    | 234                      | 206                    | 10                   | 10                      |                         |
| Chinomethionat    | 206                      | 148                    | 10                   | 15                      |                         |
| Chinomethionat    | 234                      | 206                    | 10                   | 10                      | 21.86                   |
| Chinomethionat    | 206                      | 148                    | 10                   | 15                      |                         |
| Chlorbenside      | 267.9                    | 125                    | 10                   | 8                       |                         |
| Chlorbenside      | 124.9                    | 99                     | 10                   | 20                      |                         |
| Chlorbenside      | 124.9                    | 89.1                   | 10                   | 20                      |                         |
| Chlorbenside      | 267.9                    | 125                    | 10                   | 8                       | 21.78                   |
| Chlorbenside      | 124.9                    | 99                     | 10                   | 20                      |                         |
| Chlorbenside      | 124.9                    | 89.1                   | 10                   | 20                      |                         |
| Chlordane, cis-   | 372.7                    | 266.1                  | 10                   | 25                      | 22.76                   |
| Chlordane, cis-   | 272                      | 237                    | 10                   | 20                      |                         |
| Chlordane, trans- | 372.7                    | 266.1                  | 10                   | 25                      |                         |
| Chlordane, trans- | 372.7                    | 264.1                  | 10                   | 25                      | 21.96                   |
| Chlorfenapyr      | 408                      | 59                     | 10                   | 10                      |                         |
| Chlorfenapyr      | 247                      | 227                    | 10                   | 15                      |                         |

|                      |       |       |    |    |       |
|----------------------|-------|-------|----|----|-------|
| Chlorfenapyr         | 247   | 197   | 10 | 20 |       |
| Chlorfenprop-methyl  | 195.9 | 164.8 | 15 | 10 | 9.94  |
| Chlorfenprop-methyl  | 195.9 | 124.9 | 15 | 30 |       |
| Chlorfenson          | 301.8 | 111.1 | 10 | 22 | 23.29 |
| Chlorfenson          | 174.8 | 111.1 | 10 | 10 |       |
| Chlorflurenol-methyl | 274   | 215   | 10 | 5  |       |
| Chlorflurenol-methyl | 215   | 187   | 10 | 12 | 22.04 |
| Chlorflurenol-methyl | 215   | 152   | 10 | 24 |       |
| Chlorflurenol-methyl | 274   | 215   | 10 | 5  |       |
| Chlorflurenol-methyl | 215   | 187   | 10 | 12 | 22.04 |
| Chlorflurenol-methyl | 215   | 152   | 10 | 24 |       |
| Chlormefos           | 233.8 | 121.1 | 15 | 5  |       |
| Chlormefos           | 154   | 93.1  | 15 | 10 | 7.71  |
| Chlormefos           | 154   | 65    | 15 | 15 |       |
| Chlorobenzilate      | 253   | 141   | 10 | 10 |       |
| Chlorobenzilate      | 139   | 111   | 10 | 15 | 25.40 |
| Chlorobenzilate      | 139   | 75    | 10 | 30 |       |
| Chlorobenzilate      | 251   | 139   | 10 | 12 |       |
| Chloroneb            | 191   | 141   | 20 | 10 | 8.64  |
| Chloroneb            | 191   | 113   | 20 | 15 |       |
| Chlorpropham         | 213   | 171   | 10 | 5  | 11.03 |
| Chlorpropham         | 213   | 127   | 10 | 5  |       |
| Chlorpropylat        | 250.9 | 139.1 | 10 | 15 | 25.40 |
| Chlorpropylat        | 250.9 | 111.1 | 10 | 35 |       |
| Chlorpyrifos-methyl  | 286   | 270.9 | 10 | 20 | 16.53 |
| Chlorpyrifos-methyl  | 286   | 93    | 10 | 20 |       |
| Chlorthal-dimethyl   | 301   | 223   | 10 | 25 | 19.38 |
| Chlorthal-dimethyl   | 299   | 221   | 10 | 25 |       |
| Chlorthalonil        | 265.9 | 231   | 10 | 15 |       |
| Chlorthalonil        | 265.9 | 133   | 10 | 40 | 14.79 |
| Chlorthalonil        | 263.8 | 168   | 10 | 25 |       |
| Chlorthalonil        | 265.9 | 231   | 10 | 15 |       |
| Chlorthalonil        | 265.9 | 133   | 10 | 40 | 14.79 |
| Chlorthalonil        | 263.8 | 168   | 10 | 25 |       |
| Chlorthion           | 297   | 125.1 | 10 | 10 | 19.69 |
| Chlorthion           | 297   | 109   | 10 | 10 |       |
| Chlozolate           | 330.8 | 259.1 | 10 | 5  | 21.31 |
| Chlozolate           | 188.1 | 147.1 | 10 | 15 |       |
| Cycloate             | 154   | 83.2  | 15 | 5  | 10.69 |
| Cycloate             | 154   | 71.9  | 15 | 5  |       |
| DDD, o,p'-           | 237   | 165   | 10 | 20 |       |
| DDD, o,p'-           | 235   | 199.1 | 10 | 15 | 24.33 |
| DDD, o,p'-           | 235   | 165   | 10 | 20 |       |
| DDD, p,p'-           | 237   | 165   | 10 | 25 |       |
| DDD, p,p'-           | 235   | 199.1 | 10 | 20 | 25.69 |
| DDD, p,p'-           | 235   | 165   | 10 | 20 |       |
| DDE, o,p'-           | 248   | 176   | 10 | 30 |       |
| DDE, o,p'-           | 246   | 211   | 10 | 20 | 22.43 |
| DDE, o,p'-           | 246   | 176   | 10 | 30 |       |
| DDE, p,p'-           | 248   | 176   | 10 | 30 |       |
| DDE, p,p'-           | 246   | 176   | 10 | 30 | 24.00 |
| DDE, p,p'-           | 246   | 175.1 | 10 | 20 |       |
| DDT, o,p'-           | 237   | 165   | 10 | 20 | 25.57 |
| DDT, o,p'-           | 235   | 199.1 | 10 | 20 |       |

|                           |       |       |    |    |       |
|---------------------------|-------|-------|----|----|-------|
| DDT, o,p'-                | 235   | 165   | 10 | 20 |       |
| DDT, p,p'-                | 237   | 165   | 10 | 20 |       |
| DDT, p,p'-                | 235   | 199   | 10 | 20 | 26.99 |
| DDT, p,p'-                | 235   | 165   | 10 | 20 |       |
| Desmetryn                 | 212.9 | 198.3 | 10 | 10 |       |
| Desmetryn                 | 212.9 | 141.2 | 10 | 15 | 15.96 |
| Desmetryn                 | 212.9 | 58.2  | 10 | 10 |       |
| Di-allate I + II          | 234   | 192   | 10 | 10 | 11.87 |
| Di-allate I + II          | 234   | 150   | 10 | 20 |       |
| Diazinon                  | 304   | 179   | 10 | 15 |       |
| Diazinon                  | 179.1 | 137.2 | 10 | 20 | 14.39 |
| Diazinon                  | 179.1 | 121.1 | 10 | 40 |       |
| Diazinon                  | 304   | 179   | 10 | 15 |       |
| Diazinon                  | 179.1 | 137.2 | 10 | 20 | 14.39 |
| Diazinon                  | 179.1 | 121.1 | 10 | 40 |       |
| Dichlobenil               | 171   | 136   | 15 | 15 | 6.73  |
| Dichlobenil               | 171   | 100   | 15 | 30 |       |
| Dicloran                  | 205.9 | 175.9 | 10 | 5  |       |
| Dicloran                  | 205.9 | 123.9 | 10 | 25 | 12.56 |
| Dicloran                  | 175.9 | 148   | 10 | 5  |       |
| Dicloran                  | 175.9 | 140   | 10 | 10 |       |
| Dicloran                  | 205.9 | 175.9 | 10 | 5  |       |
| Dicloran                  | 205.9 | 123.9 | 10 | 25 | 12.56 |
| Dicloran                  | 175.9 | 148   | 10 | 5  |       |
| Dicloran                  | 175.9 | 140   | 10 | 10 |       |
| Dicofol, o,p-             | 251   | 139   | 15 | 15 |       |
| Dicofol, o,p-             | 139   | 111   | 15 | 18 | 17.57 |
| Dicofol, o,p-             | 139   | 75    | 15 | 30 |       |
| Dicofol, p,p-             | 251   | 139   | 10 | 15 |       |
| Dicofol, p,p-             | 139   | 111   | 10 | 18 | 19.16 |
| Dicofol, p,p-             | 139   | 75    | 10 | 30 |       |
| Dieldrin                  | 262.8 | 228   | 10 | 30 |       |
| Dieldrin                  | 262.8 | 193   | 10 | 30 | 23.80 |
| Dieldrin                  | 262.8 | 191   | 10 | 30 |       |
| Dinobuton                 | 211   | 117.1 | 10 | 15 | 20.75 |
| Dinobuton                 | 211   | 89.1  | 10 | 30 |       |
| Diphenylamine             | 169   | 168   | 15 | 15 |       |
| Diphenylamine             | 169   | 167   | 15 | 20 | 10.48 |
| Diphenylamine             | 169   | 141   | 15 | 20 |       |
| Endosulfan (alpha isomer) | 241   | 206   | 10 | 15 |       |
| Endosulfan (alpha isomer) | 229   | 194   | 10 | 10 | 22.55 |
| Endosulfan (alpha isomer) | 195   | 159   | 10 | 5  |       |
| Endosulfan (beta isomer)  | 238.8 | 204   | 10 | 15 |       |
| Endosulfan (beta isomer)  | 229   | 194   | 10 | 10 | 25.15 |
| Endosulfan (beta isomer)  | 195   | 159   | 10 | 10 |       |
| Endosulfan sulfate        | 387   | 253   | 10 | 5  |       |
| Endosulfan sulfate        | 271.9 | 237   | 10 | 20 | 26.76 |
| Endosulfan sulfate        | 271.9 | 117   | 10 | 40 |       |
| Endrin                    | 281   | 245   | 10 | 20 |       |
| Endrin                    | 263   | 193   | 10 | 35 | 24.70 |
| Endrin                    | 263   | 191   | 10 | 35 |       |
| Etaconazole               | 244.9 | 191.1 | 10 | 5  | 25.75 |
| Etaconazole               | 244.9 | 172.9 | 10 | 15 |       |

|                      |       |       |    |    |       |
|----------------------|-------|-------|----|----|-------|
| Etaconazole          | 172.8 | 145   | 10 | 15 |       |
| Etaconazole          | 172.8 | 109.2 | 10 | 30 |       |
| Etridiazole          | 210.9 | 182.9 | 15 | 5  |       |
| Etridiazole          | 183   | 108   | 15 | 40 | 7.92  |
| Etridiazole          | 182.9 | 139.9 | 15 | 15 |       |
| Fenchlorphos         | 285   | 93    | 15 | 25 |       |
| Fenchlorphos         | 284.9 | 269.9 | 15 | 15 | 17.27 |
| Fenchlorphos         | 284.9 | 239.9 | 15 | 35 |       |
| Fenitrothion         | 277   | 260   | 15 | 5  |       |
| Fenitrothion         | 276.8 | 260   | 15 | 5  |       |
| Fenitrothion         | 276.8 | 125   | 15 | 15 |       |
| Fenitrothion         | 277   | 260   | 60 | 5  |       |
| Fenitrothion         | 276.8 | 260   | 60 | 5  |       |
| Fenitrothion         | 276.8 | 125   | 60 | 15 |       |
| Fenson               | 268   | 141   | 10 | 5  |       |
| Fenson               | 141   | 77.1  | 10 | 5  | 19.60 |
| Fenvalerat (RR + SS) | 225   | 119   | 70 | 15 |       |
| Fenvalerat (RR + SS) | 167   | 125   | 70 | 10 | 34.79 |
| Fenvalerat (RR + SS) | 167   | 89    | 70 | 40 |       |
| Fenvalerat (RS + SR) | 225   | 119   | 70 | 15 |       |
| Fenvalerat (RS + SR) | 167   | 125   | 70 | 10 | 34.37 |
| Fenvalerat (RS + SR) | 167   | 89    | 70 | 40 |       |
| Fluchloralin         | 325.9 | 63    | 10 | 15 |       |
| Fluchloralin         | 306.1 | 206   | 10 | 15 | 14.59 |
| Fluchloralin         | 306   | 264   | 10 | 5  |       |
| Flumethralin         | 360   | 314   | 10 | 16 |       |
| Flumethralin         | 143   | 117   | 10 | 20 | 23.25 |
| Flumethralin         | 143   | 107   | 10 | 24 |       |
| Fluotrimazole        | 379   | 276   | 10 | 10 |       |
| Fluotrimazole        | 311   | 242   | 10 | 15 | 28.04 |
| Fluotrimazole        | 311   | 165   | 10 | 20 |       |
| Folpet               | 260   | 130   | 10 | 15 |       |
| Folpet               | 147   | 103.1 | 10 | 5  | 24.56 |
| Folpet               | 147   | 76    | 10 | 25 |       |
| Fonofos              | 246.1 | 137   | 10 | 5  |       |
| Fonofos              | 246   | 109.1 | 10 | 15 | 13.81 |
| Genite               | 304   | 141.1 | 10 | 5  |       |
| Genite               | 302   | 141   | 10 | 5  | 22.94 |
| Genite               | 141   | 77    | 10 | 5  |       |
| HCH alpha isomer     | 219   | 183   | 10 | 10 |       |
| HCH alpha isomer     | 219   | 145   | 10 | 20 | 12.03 |
| HCH alpha isomer     | 181   | 145   | 10 | 15 |       |
| HCH beta isomer      | 219   | 183.1 | 10 | 10 |       |
| HCH beta isomer      | 219   | 145   | 10 | 20 | 13.25 |
| HCH beta isomer      | 181   | 145.1 | 10 | 15 |       |
| HCH delta            | 219   | 183   | 10 | 10 |       |
| HCH delta            | 219   | 145   | 10 | 20 | 14.58 |
| HCH delta            | 181   | 145   | 10 | 15 |       |
| HCH epsilon isomer   | 219   | 183   | 10 | 10 |       |
| HCH epsilon isomer   | 219   | 145   | 10 | 20 | 15.45 |
| HCH epsilon isomer   | 181   | 145   | 10 | 15 |       |
| Heptachlor           | 274   | 239   | 10 | 20 |       |
| Heptachlor           | 271.9 | 236.8 | 10 | 25 | 16.71 |
| Heptachlor           | 271.9 | 116.9 | 10 | 40 |       |

|                               |       |       |    |    |       |
|-------------------------------|-------|-------|----|----|-------|
| Heptachlor epoxide, cis-      | 353   | 282   | 10 | 15 | 20.64 |
| Heptachlor epoxide, cis       | 353   | 263   | 10 | 15 |       |
| Heptachlor epoxide,<br>trans- | 217   | 182   | 10 | 15 |       |
| Heptachlor epoxide,<br>trans- | 183   | 155   | 10 | 20 | 20.88 |
| Heptachlor epoxide,<br>trans- | 183   | 119   | 10 | 30 |       |
| Hexachlorobenzene             | 283.9 | 248.8 | 10 | 25 | 12.31 |
| Hexachlorobenzene             | 283.9 | 213.9 | 10 | 35 |       |
| Isocarbophos                  | 230   | 212   | 10 | 8  | 19.56 |
| Isocarbophos                  | 136   | 108   | 10 | 14 |       |
| Isodrin                       | 262.8 | 193   | 10 | 37 |       |
| Isodrin                       | 192.9 | 157.1 | 10 | 25 | 19.94 |
| Isodrin                       | 192.9 | 123   | 10 | 35 |       |
| Isofenphos-oxon               | 228.9 | 201   | 10 | 8  | 19.67 |
| Isofenphos-oxon               | 228.9 | 121   | 10 | 30 |       |
| Isopropalin                   | 280   | 238   | 10 | 10 | 20.62 |
| Isopropalin                   | 280   | 118.2 | 10 | 30 |       |
| Jodfenphos                    | 376.9 | 361.9 | 10 | 20 | 23.53 |
| Jodfenphos                    | 376.9 | 93    | 10 | 35 |       |
| Leptophos                     | 171   | 124   | 10 | 10 | 29.75 |
| Leptophos                     | 171   | 77    | 10 | 25 |       |
| Lindane                       | 218.8 | 183   | 10 | 5  |       |
| Lindane                       | 181   | 109   | 10 | 30 | 13.39 |
| Lindane                       | 180.9 | 145   | 10 | 12 |       |
| Methoxychlor                  | 227   | 169   | 10 | 25 | 28.89 |
| Methoxychlor                  | 227   | 141   | 10 | 32 |       |
| Methyl parathion              | 263   | 109.1 | 10 | 15 | 16.54 |
| Methyl parathion              | 263   | 79.1  | 10 | 30 |       |
| Mirex                         | 272   | 237   | 10 | 15 |       |
| Mirex                         | 272   | 235   | 10 | 25 | 29.84 |
| Mirex                         | 272   | 117   | 10 | 40 |       |
| Naled                         | 185   | 109   | 15 | 15 |       |
| Naled                         | 145   | 109   | 15 | 25 | 5.81  |
| Naled                         | 109   | 79    | 15 | 5  |       |
| Nitrofen                      | 282.9 | 253   | 10 | 10 |       |
| Nitrofen                      | 282.9 | 202.1 | 10 | 10 | 24.86 |
| Nitrofen                      | 282.9 | 162   | 10 | 25 |       |
| Nitrothal-isopropyl           | 235.9 | 194.1 | 10 | 5  | 19.80 |
| Nitrothal-isopropyl           | 235.9 | 148.1 | 10 | 20 |       |
| Oxychlorane                   | 387   | 263   | 10 | 14 |       |
| Oxychlorane                   | 187   | 151   | 10 | 4  | 20.69 |
| Oxychlorane                   | 185   | 149   | 10 | 4  |       |
| Paclobutrazol                 | 236   | 167   | 10 | 20 | 22.52 |
| Paclobutrazol                 | 236   | 125   | 10 | 20 |       |
| Pentachloroaniline            | 265   | 194   | 10 | 20 | 15.50 |
| Pentachloroaniline            | 265   | 158   | 10 | 35 |       |
| Pentachloroanisole            | 264.8 | 143   | 10 | 35 | 12.52 |
| Pentachloroanisole            | 264.8 | 117.1 | 10 | 35 |       |
| Pentachlorobenzene            | 250   | 213   | 20 | 15 |       |
| Pentachlorobenzene            | 249.9 | 214.9 | 20 | 20 | 8.90  |
| Pentachlorobenzene            | 249.9 | 142   | 20 | 40 |       |
| Perthane                      | 222.8 | 179.2 | 10 | 20 | 25.12 |
| Perthane                      | 222.8 | 165.3 | 10 | 25 |       |
| Phenkapton                    | 375.7 | 153   | 10 | 5  | 28.90 |

|                                  |       |       |    |    |       |
|----------------------------------|-------|-------|----|----|-------|
| Phenkapton                       | 191   | 155   | 10 | 20 |       |
| Phenylphenol, o-                 | 170   | 141.2 | 20 | 20 |       |
| Phenylphenol, o-                 | 170   | 115.1 | 20 | 35 | 8.79  |
| Phenylphenol, o-                 | 169   | 115   | 20 | 35 |       |
| Phosphamidon II                  | 264   | 127   | 10 | 15 | 16.18 |
| Phosphamidon II                  | 127   | 109   | 10 | 10 |       |
| Phthalimid                       | 147   | 104   | 15 | 20 |       |
| Phthalimid                       | 147   | 103   | 15 | 20 |       |
| Procymidone                      | 283   | 255   | 10 | 10 |       |
| Procymidone                      | 283   | 96    | 10 | 10 | 21.91 |
| Procymidone                      | 283   | 67.1  | 10 | 40 |       |
| Procymidone                      | 283   | 255   | 10 | 10 |       |
| Procymidone                      | 283   | 96    | 10 | 10 | 21.91 |
| Procymidone                      | 283   | 67.1  | 10 | 40 |       |
| Profluralin                      | 318.1 | 237.9 | 10 | 15 | 13.97 |
| Profluralin                      | 318.1 | 199.1 | 10 | 10 |       |
| Propachlor                       | 176   | 92    | 15 | 20 |       |
| Propachlor                       | 120.1 | 92.1  | 15 | 5  | 10.30 |
| Propachlor                       | 120.1 | 77.1  | 15 | 20 |       |
| Propanil                         | 217   | 161   | 10 | 8  |       |
| Propanil                         | 161   | 126   | 10 | 15 | 16.15 |
| Propanil                         | 161   | 99    | 10 | 25 |       |
| Propanil                         | 161   | 90.1  | 10 | 20 |       |
| Propanil                         | 217   | 161   | 15 | 8  |       |
| Propanil                         | 161   | 126   | 15 | 15 | 16.15 |
| Propanil                         | 161   | 99    | 15 | 25 |       |
| Propanil                         | 161   | 90.1  | 15 | 20 |       |
| Quintozene                       | 237   | 143   | 10 | 30 |       |
| Quintozene                       | 237   | 119   | 10 | 30 | 13.61 |
| Quintozene                       | 295   | 237   | 10 | 20 |       |
| Spiromesifen                     | 370   | 272   | 10 | 5  |       |
| Spiromesifen                     | 273   | 255   | 10 | 10 | 28.38 |
| Spiromesifen                     | 272   | 254   | 10 | 5  |       |
| S421                             | 130   | 95    | 15 | 20 | 17.28 |
| S421                             | 130   | 60.1  | 15 | 35 |       |
| TDCPP                            | 381   | 159   | 10 | 12 |       |
| TDCPP                            | 381   | 123   | 10 | 24 | 26.78 |
| TDCPP                            | 321   | 99    | 10 | 10 |       |
| Tecnazene                        | 215   | 179   | 15 | 15 |       |
| Tecnazene                        | 203   | 83.1  | 15 | 25 | 10.20 |
| Tecnazene                        | 202.9 | 143   | 15 | 20 |       |
| Tefluthrin, cis-                 | 177   | 137   | 10 | 15 | 14.99 |
| Tefluthrin, cis-                 | 177   | 127   | 10 | 15 |       |
| Terbacil                         | 161   | 144   | 10 | 10 | 14.68 |
| Terbacil                         | 161   | 88.1  | 10 | 20 |       |
| Terbacil                         | 161   | 144   | 10 | 10 | 14.68 |
| Terbacil                         | 161   | 88.1  | 10 | 20 |       |
| Tetradifon                       | 355.7 | 159   | 10 | 10 | 29.41 |
| Tetradifon                       | 353.7 | 159   | 10 | 10 |       |
| cis-1,2,3,6-Tetrahydrophthalimid | 151   | 80    | 20 | 10 | 8.27  |
| cis-1,2,3,6-Tetrahydrophthalimid | 151   | 79    | 20 | 15 |       |
| Tetrasul                         | 323.8 | 253.8 | 10 | 25 | 26.06 |
| Tetrasul                         | 251.8 | 217.2 | 10 | 25 |       |

|                     |       |       |    |    |       |
|---------------------|-------|-------|----|----|-------|
| Tetrasul            | 251.8 | 182.2 | 10 | 35 |       |
| Triadimenol         | 168   | 70    | 10 | 10 | 22.04 |
| Triadimenol         | 128   | 65    | 10 | 20 |       |
| Triadimenol         | 168   | 70    | 10 | 10 | 22.04 |
| Triadimenol         | 128   | 65    | 10 | 20 |       |
| Tri-allate          | 269.9 | 186   | 10 | 20 | 14.88 |
| Tri-allate          | 267.9 | 184   | 10 | 20 |       |
| Trichloronate       | 296.8 | 269.2 | 10 | 10 | 19.76 |
| Trichloronate       | 296.8 | 223   | 10 | 35 |       |
| Trifluralin         | 306   | 264   | 10 | 10 | 11.58 |
| Trifluralin         | 263.9 | 160.1 | 10 | 15 |       |
| Triphenyl phosphate | 326.1 | 233   | 10 | 10 |       |
| Triphenyl phosphate | 326   | 169   | 10 | 30 | 27.72 |
| Triphenyl phosphate | 326   | 77    | 10 | 30 |       |
| Vinclozolin         | 284.8 | 213   | 10 | 10 |       |
| Vinclozolin         | 212   | 172   | 10 | 15 | 16.57 |
| Vinclozolin         | 212   | 145   | 10 | 20 |       |
| Zoxamide            | 258   | 187   | 10 | 15 | 28.07 |
| Zoxamide            | 258   | 159   | 10 | 30 |       |
| Zoxamide            | 258   | 187   | 10 | 15 | 28.07 |
| Zoxamide            | 258   | 159   | 10 | 30 |       |

3

4

5

6

7

8

9

10

11

12

13

14

15

16

17

18

19

20

21
