# Supplementary material for: Pesticide distribution and depletion kinetic determination in honey and beeswax: Model for pesticide occurrence and distribution in beehive products
Source: PubMed Central journal article supplement (PMC6382162; doi:10.1371/journal.pone.0212631), 2019-02-20
Supplement: pone.0212631.s003.pdf [file pone.0212631.s003.pdf]

1 **S3 Table. Linear regression F-test of LogD vs time<sup>a</sup>**

|                     | Slope<br>Coefficients | R Square | Critical<br><i>F value</i> | P-value |
|---------------------|-----------------------|----------|----------------------------|---------|
| Acetamipride        | 0.0003                | 0.37     | 1.76                       | 0.28    |
| Clothianidine       | 0.0003                | 0.28     | 0.79                       | 0.47    |
| Imidaclopride       | 0.0003                | 0.01     | 0.03                       | 0.88    |
| Thiaclopride        | 0.0002                | 0.15     | 0.54                       | 0.52    |
| Thiamethoxam        | -0.0017               | 0.13     | 0.47                       | 0.54    |
| Alachlor            | 0.0002                | 0.04     | 0.14                       | 0.74    |
| Atrazine            | 0.0005                | 0.11     | 0.37                       | 0.59    |
| Metolachlor         | 0.0005                | 0.22     | 0.85                       | 0.42    |
| Chlorantraniliprole | 0.0006                | 0.09     | 0.30                       | 0.62    |
| chlorpyrifos        | 0.00002               | 0.002    | 0.003                      | 0.96    |
| Fenbutatin oxide    | -0.0001               | 0.02     | 0.06                       | 0.83    |
| coumaphos           | -0.0001               | 0.21     | 0.53                       | 0.54    |
| Boscalid            | 0.00002               | 0.003    | 0.01                       | 0.93    |
| Carbendazim         | -0.00001              | 0.001    | 0.001                      | 0.98    |
| Metoconazole        | -0.0001               | 0.014    | 0.04                       | 0.85    |

2 <sup>a</sup>The null hypothesis states, that the linear slope of LogD vs. time equals zero. The F-  
3 test enables to determine, whether the slope is significantly different form zero. For  
4 calculated p value > 0.05, the linear slope was statistically defined as zero.

5 <sup>b</sup>Linear slope

6 <sup>c</sup>R<sup>2</sup>, coefficient of determination, defined as the proportion of the variance in the  
7 dependent variable (LogD) that is predictable from the independent variable (time).

8 <sup>d</sup>F statistics, test statistic for testing the statistical significance of the model.

9 <sup>e</sup>P-value; when the calculated p value is above the significance level of 0.05, then the  
10 null hypothesis is accepted as true, hence, the linear slope equals to zero.

11

12
